# Supplementary material for: “Sweet” ionic liquid gels: materials for sweetening of fuels
Source: Royal Society of Chemistry journal article supplement (doi:10.1039/c8gc01615a), 2018-01-01
Supplement: c8gc01615a1.pdf [file c8gc01615a1.pdf]

## Supporting Information for “Sweet” Ionic Liquid Gels: Materials for Sweetening of Fuels

Floriana Billeci, Francesca D’Anna,\* H. Q. Nimal Gunaratne, Natalia V. Plechkova,  
Kenneth R. Seddon

|                                                                                                                                                                                                                                                                                          |         |
|------------------------------------------------------------------------------------------------------------------------------------------------------------------------------------------------------------------------------------------------------------------------------------------|---------|
| Synthetic details                                                                                                                                                                                                                                                                        | S3      |
| <b>Figure S1.</b> DSC thermograms for salts used.                                                                                                                                                                                                                                        | S4      |
| <b>Figure S2.</b> TGA traces for salts used.                                                                                                                                                                                                                                             | S5      |
| <b>Figure S3.</b> DSC thermograms obtained for gel phases.                                                                                                                                                                                                                               | S6      |
| <b>Figure S4.</b> Strain sweep measurements performed at a frequency of 1 Hz and 25 °C for ILGs at 6.5 % wt of gelator.                                                                                                                                                                  | S7      |
| <b>Figure S5.</b> Plots of the opacity and $I_{RLS}$ as a function of the time for ILGs at 6.5% wt of gelator.                                                                                                                                                                           | S8-S9   |
| <b>Figure S6.</b> $^1\text{H}$ NMR spectra of ILGs at 6.5% wt as a function of temperature                                                                                                                                                                                               | S10-S16 |
| <b>Figure S7.</b> Enlarged region of $^1\text{H}$ NMR spectra of $[\text{P}_{444}][\text{Glu}]/[\text{N}_{1444}][\text{NTf}_2]$ at 3.0 % wt as a function of temperature.                                                                                                                | S17     |
| <b>Figure S8.</b> Changes in chemical shift as a function of the temperature for the ILGs.                                                                                                                                                                                               | S18-S19 |
| <b>Figure S9.</b> FT-IR spectra for neat gelator, ionic liquid and corresponding ILG at 6.5 % wt of gelator.                                                                                                                                                                             | S20     |
| <b>Figure S10.</b> $^1\text{H}$ NMR spectra of hexane solution after 7h of contact time with $[\text{P}_{4444}][\text{Glu}]/[\text{N}_{2224}][\text{NTf}_2]$ or $[\text{P}_{4444}][\text{Glu}]/[\text{N}_{1444}][\text{NTf}_2]$ .                                                        | S21     |
| <b>Figure S11.</b> $^1\text{H}$ NMR spectra of hexane solution of benzene at (a) - (b) 2000 ppm and (c) - (d) 500 ppm after 7h of contact time with $[\text{P}_{4444}][\text{Glu}]/[\text{N}_{2224}][\text{NTf}_2]$ or $[\text{P}_{4444}][\text{Glu}]/[\text{N}_{1444}][\text{NTf}_2]$ . | S22-S23 |
| <b>Table S1.</b> Gelation tests performed in conventional solvents and ILs for the salts used.                                                                                                                                                                                           | S24     |
| <b>Table S2.</b> Stretching frequencies corresponding to gelator ( $\nu_{\text{gelator}}$ ) and ILGs ( $\nu_{\text{ILG}}$ ) and changes in stretching frequencies ( $\Delta\nu$ ) on going from gelator to gel phase.                                                                    | S25-S26 |
| <b>Table S3.</b> Adsorption efficiency (AE) of sulphur compounds on ILGs at 6.5% wt of gelator and corresponding ILs at 20 °C.                                                                                                                                                           | S27     |
| <b>Table S4.</b> Adsorption efficiency (AE) of sulphur compounds on $[\text{P}_{4444}][\text{Glu}]/[\text{N}_{2224}][\text{NTf}_2]$ at 6.5% wt of gelator as a                                                                                                                           | S27     |

function of the time at 20 °C.

**Table S5.** Adsorption efficiency (AE) of sulphur compounds on [P<sub>4444</sub>][Glu]/[N<sub>1444</sub>][NTf<sub>2</sub>] at 6.5% wt of gelator as a function of the time at 20 °C. **S28**

**Table S6.** Adsorption efficiency (AE) of sulphur compounds on ILGs at 6.5% wt of gelator, using solution of single components (C = 1500 ppm) or mixed solutions (C = 1500 ppm), at 20 °C. **S28**

**Table S7.** Adsorption efficiency (AE) of sulphur compounds on ILGs at 6.5% wt of gelator, as a function of concentration of sulphur compounds, at 20 °C. **S29**

**Table S8.** Adsorption efficiency (AE) of sulphur compounds on ionic liquid gels, at 6.5% wt of gelator, as a function of fuel volume (C = 1500 ppm), at 20 °C. **S29**

**Table S9.** Adsorption efficiency (AE) of sulphur compounds (C = 1500 ppm) on ILGs, at 6.5% wt of gelator, as a function of vial diameter, at 20 °C. **S29**

**Table S10.** Adsorption efficiency (AE) of sulphur compounds (C = 1500 ppm) on ILGs, at 6.5% wt of gelator, using different ways of use, at 20 °C. **S30**

**Table S11.** Adsorption efficiency (AE) of sulphur compounds (C = 1500 ppm) on ILGs, at 6.5% wt of gelator, after different cycles of reuse, at 20 °C. **S30**

### General neutralization reaction procedure:

The hydroxide salt aqueous solution (0.020 mol of salt) and the gluconic acid aqueous solution (0.024 mol of gluconic acid) were put in a round flask and stirred for 24 hours. After this time the neutralization reaction was stopped and the water was removed under vacuum. The white solid obtained was dry under nitrogen vacuum overnight.

#### *Trihexyltetradecylphosphonium gluconate* [P<sub>66614</sub>][Glu]:

The first step of this synthesis was the anion exchange to replace the Cl<sup>-</sup> anion with [OH]<sup>-</sup> anion using the Amberlite™ IRN-78 ion-exchange resin, OH-form according to a previously reported procedure.<sup>1</sup>

Yield: 89%; white solid; m.p.: 35.6 °C; <sup>1</sup>H NMR (600 MHz; DMSO-d<sub>6</sub>); δ (ppm): 3.73 (dd, 1H); 3.57 (m, 2H); 3.50, (m, 1H); 3.41 (dd, 2H); 3.31 (m, 3H); 2.17 (m, 7H); (m, 13H); 1.30 (m, 50H); 0.88 (m, 12H). <sup>13</sup>C NMR (600 MHz, DMSO-d<sub>6</sub>); δ (ppm): 176.4; 72.8; 72.4; 72.1; 71.6; 64.2; 31.8; 30.7; 30.3; 30.1; 29.5; 29.2; 29.1; 28.5; 22.6; 22.3; 21.0; 18.2; 17.7; 14.4; 14.3. TOFMS calcd for C<sub>38</sub>H<sub>79</sub>O<sub>7</sub>P 678.5563, found 678.5575.

#### *Tetrabutylphosphonium gluconate* [P<sub>4444</sub>][Glu]:

Yield: 98%; white solid; m.p.: 81.5 °C; <sup>1</sup>H NMR (600 MHz; DMSO-d<sub>6</sub>); δ (ppm): 4.63 (s, 1H); 4.50 (d, 1H); 4.41 (s, 1H); 4.17 (s, 1H); 3.71 (m, 1H); 3.55 (d, 1H); 3.48 (t, 1H, J=6 Hz); 3.40 (s, 1H); 3.3 (m, 1H); 2.18 (m, 6H); 1.45 (m, 16H); 0.92 (t, 12H, J=12 Hz). <sup>13</sup>C NMR (600 MHz, D<sub>2</sub>O); δ (ppm): 178.5; 74.0; 72.5; 71.1; 70.9; 62.6; 23.3; 23.2; 22.7; 17.8; 17.4; 12.5. TOFMS calcd for C<sub>22</sub>H<sub>47</sub>O<sub>7</sub>P 454.3059, found 454.3099.

#### *Tetrabutylammonium gluconate* [N<sub>4444</sub>][Glu]:

Yield: 95%; white solid; m.p.: 134.9 °C; <sup>1</sup>H NMR (400 MHz; D<sub>2</sub>O); δ (ppm): 4.11 (d, 1H); 4.01 (t, 1H, J=4 Hz); 3.82 (m, 1H); 3.80 (d, 1H); 3.75 (m, 2H); 3.65 (m, 1H); 3.19 (m, 8H); 1.64 (m, 8H); 1.36 (st, 8H); 0.94 (t, 12H, J=8 Hz). <sup>13</sup>C NMR (400 MHz, CDCl<sub>3</sub>); δ (ppm): 175.5; 72.8; 72.4; 72.0; 71.5; 70.8; 64.2; 57.9; 30.2; 23.5; 19.7; 14.0. TOFMS calcd for C<sub>22</sub>H<sub>47</sub>NO<sub>7</sub> 437.3353, found 454.3056.

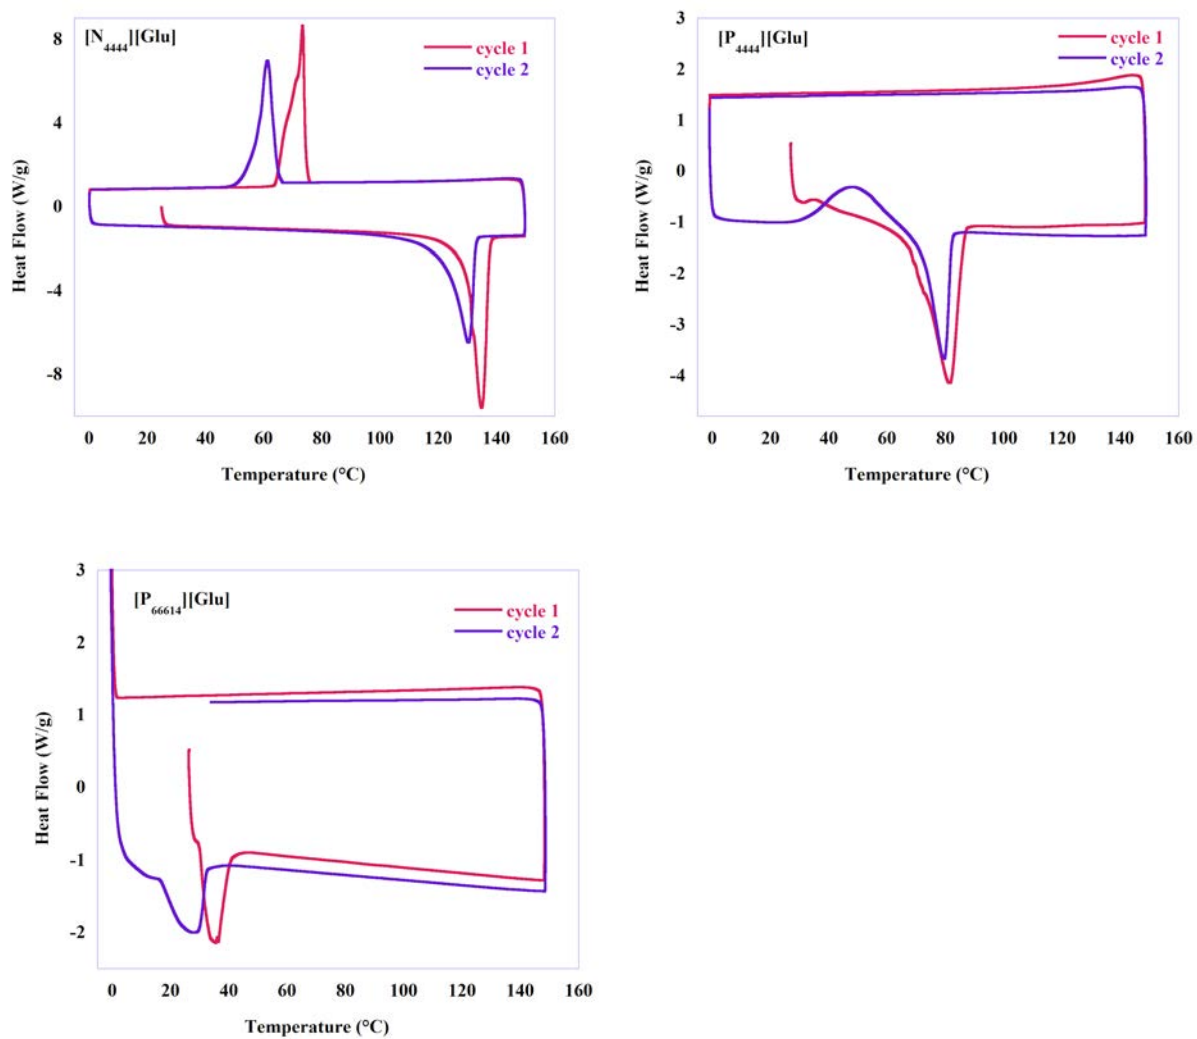

**Figure S1.** DSC thermograms for salts used (endothermic transition points downwards).

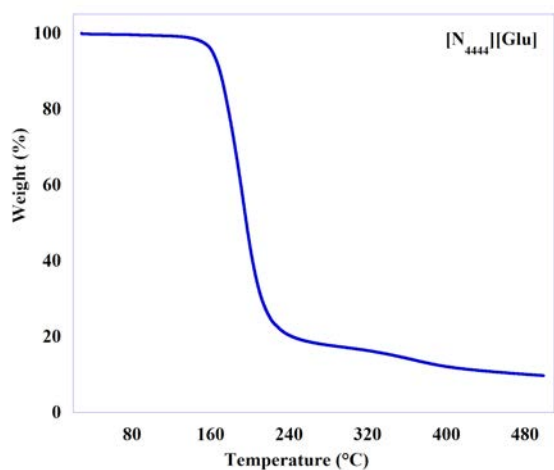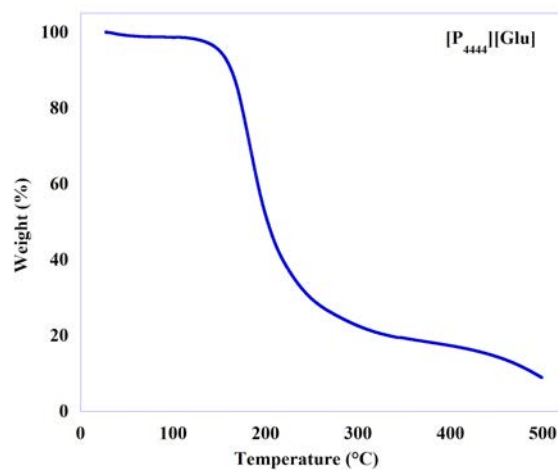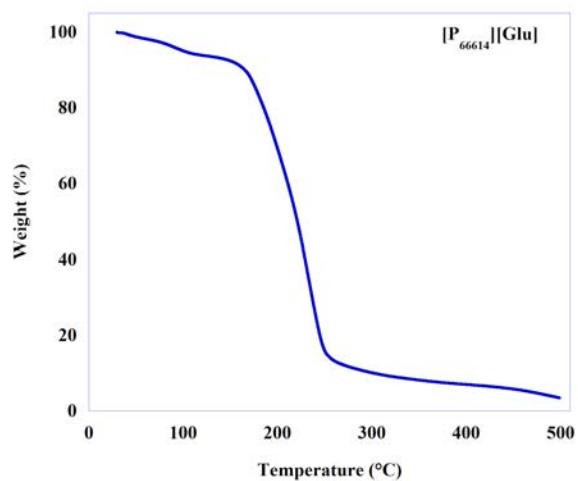

Figure S2. TGA traces for salts used.

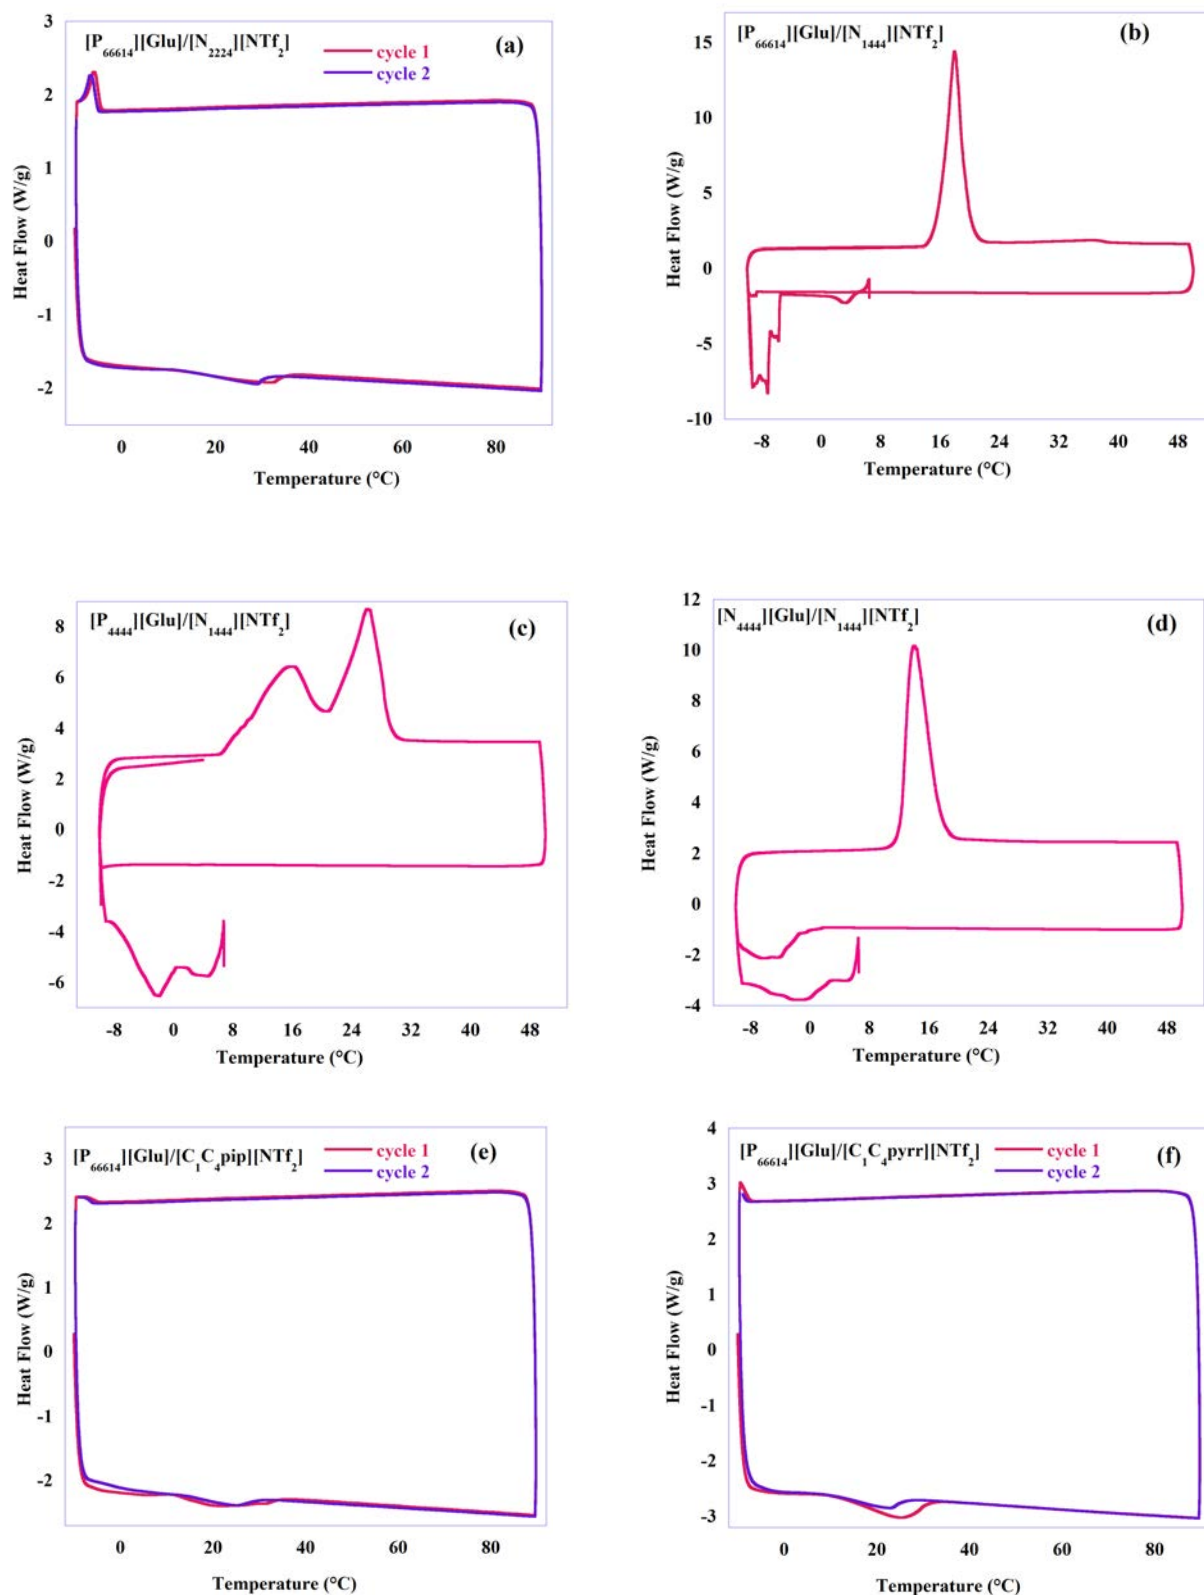

**Figure S3.** DSC thermograms obtained for gel phases. (a), (e) and (f) endothermic transition points downwards; (b)-(d) endothermic transition points upwards.

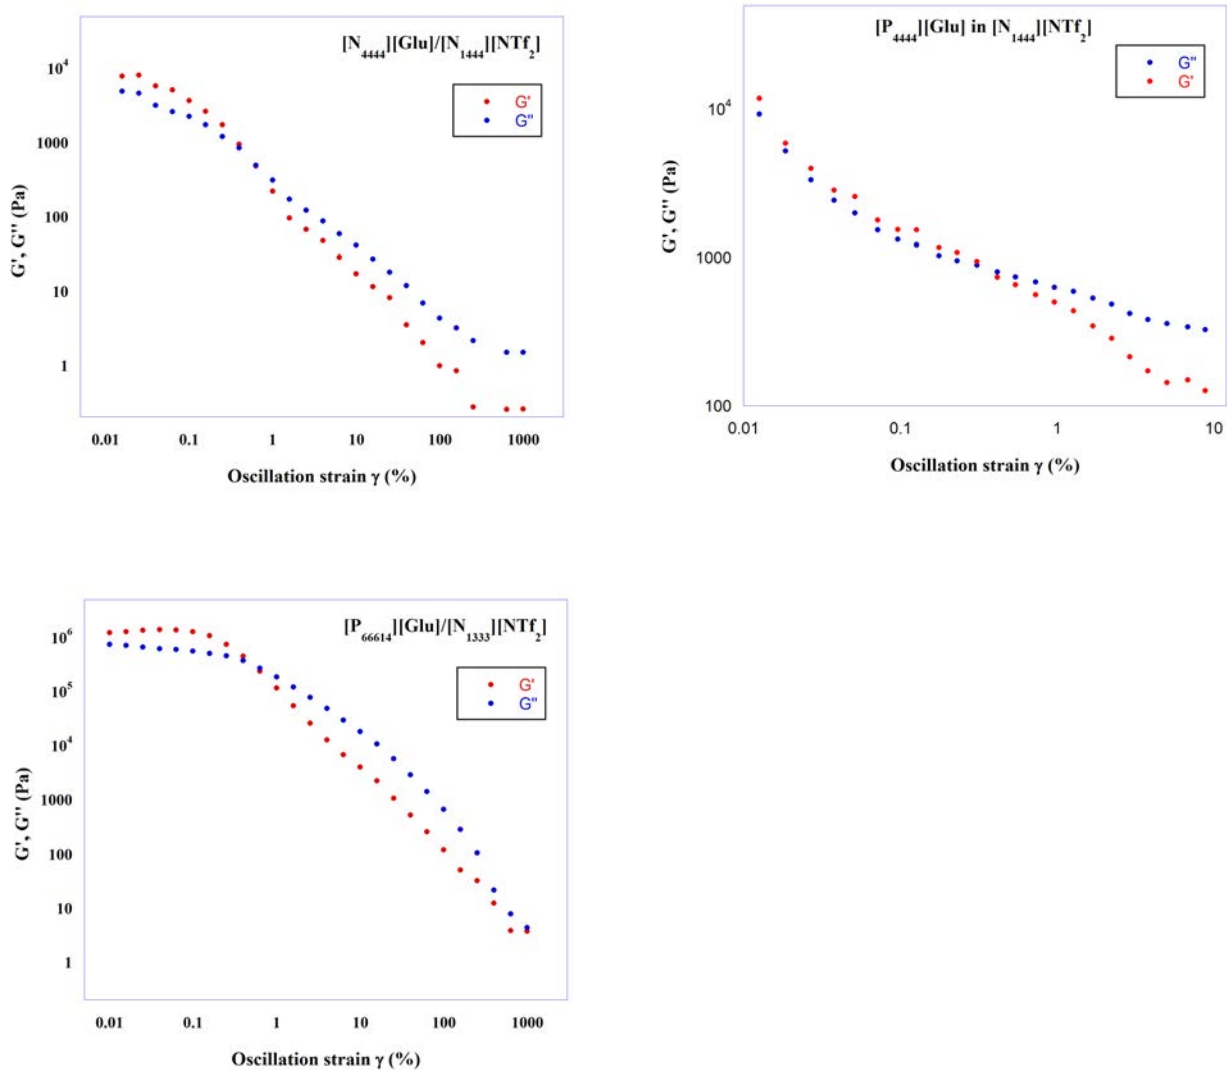

**Figure S4.** Strain sweep measurements performed at a frequency of 1 Hz and 25 °C for ILGs at 6.5 % wt of gelator.

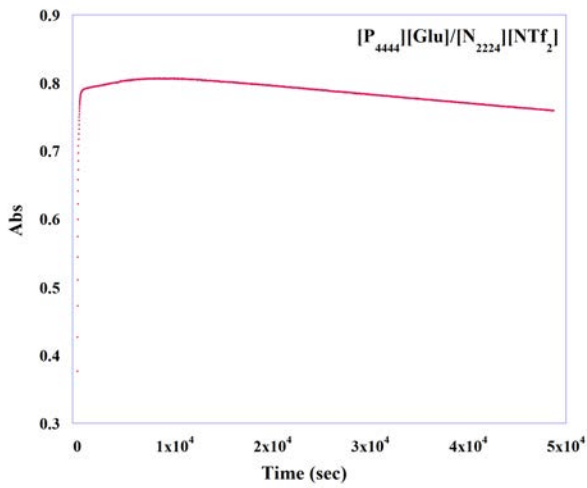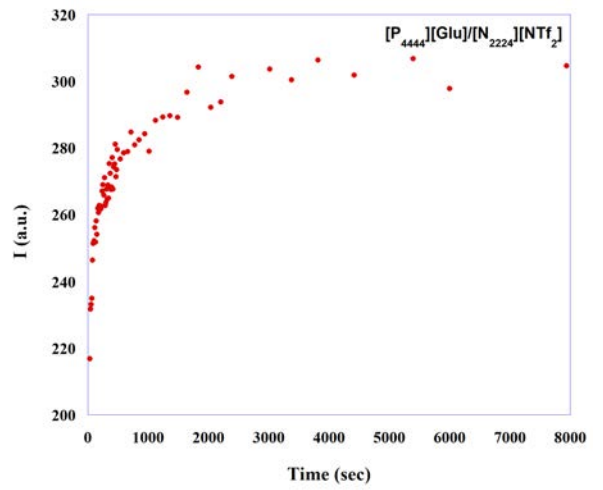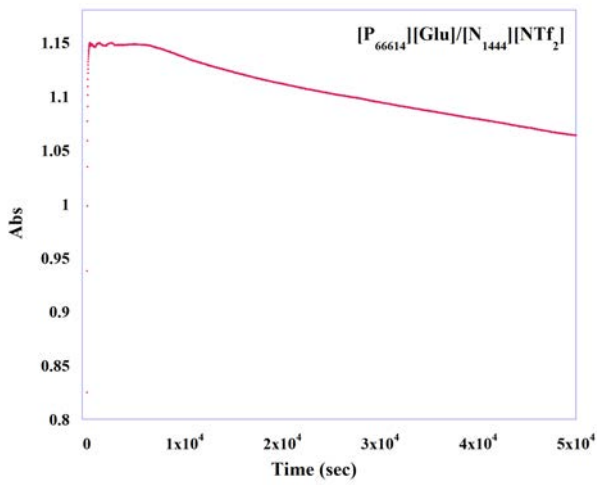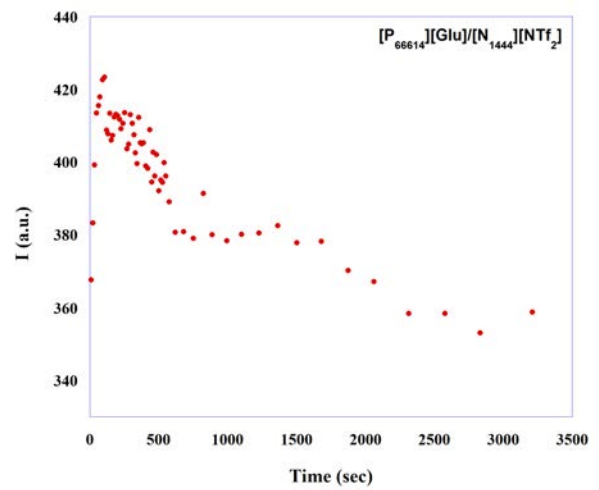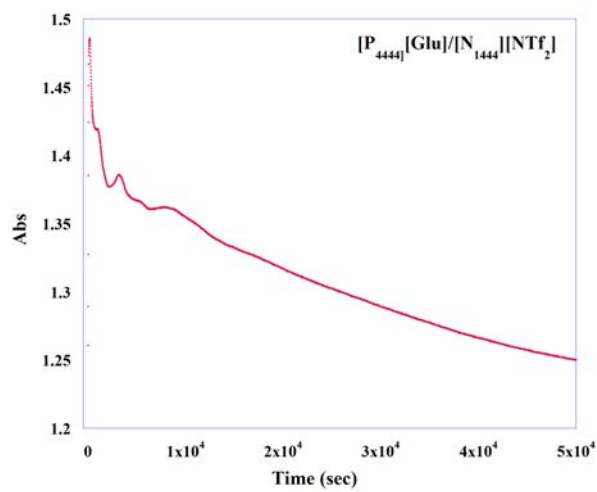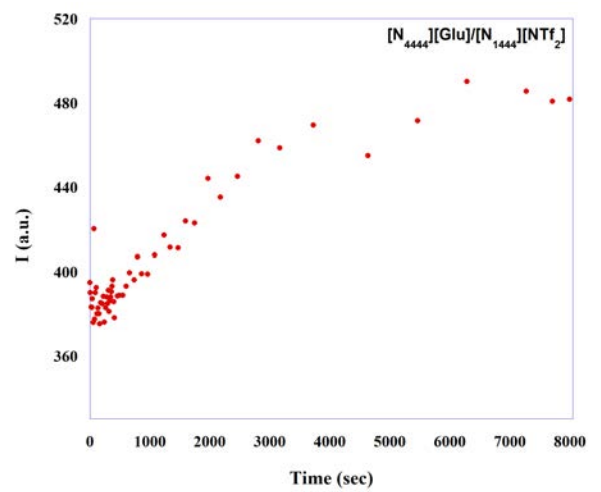



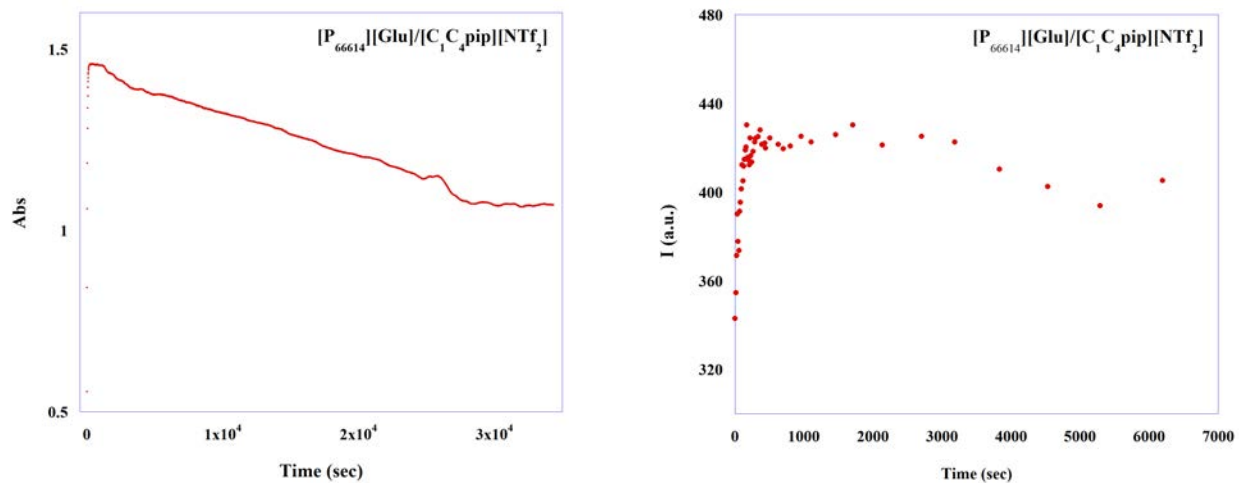

**Figure S5.** Plots of the opacity and  $I_{\text{RLS}}$  as a function of the time for ILGs at 6.5% wt of gelator.

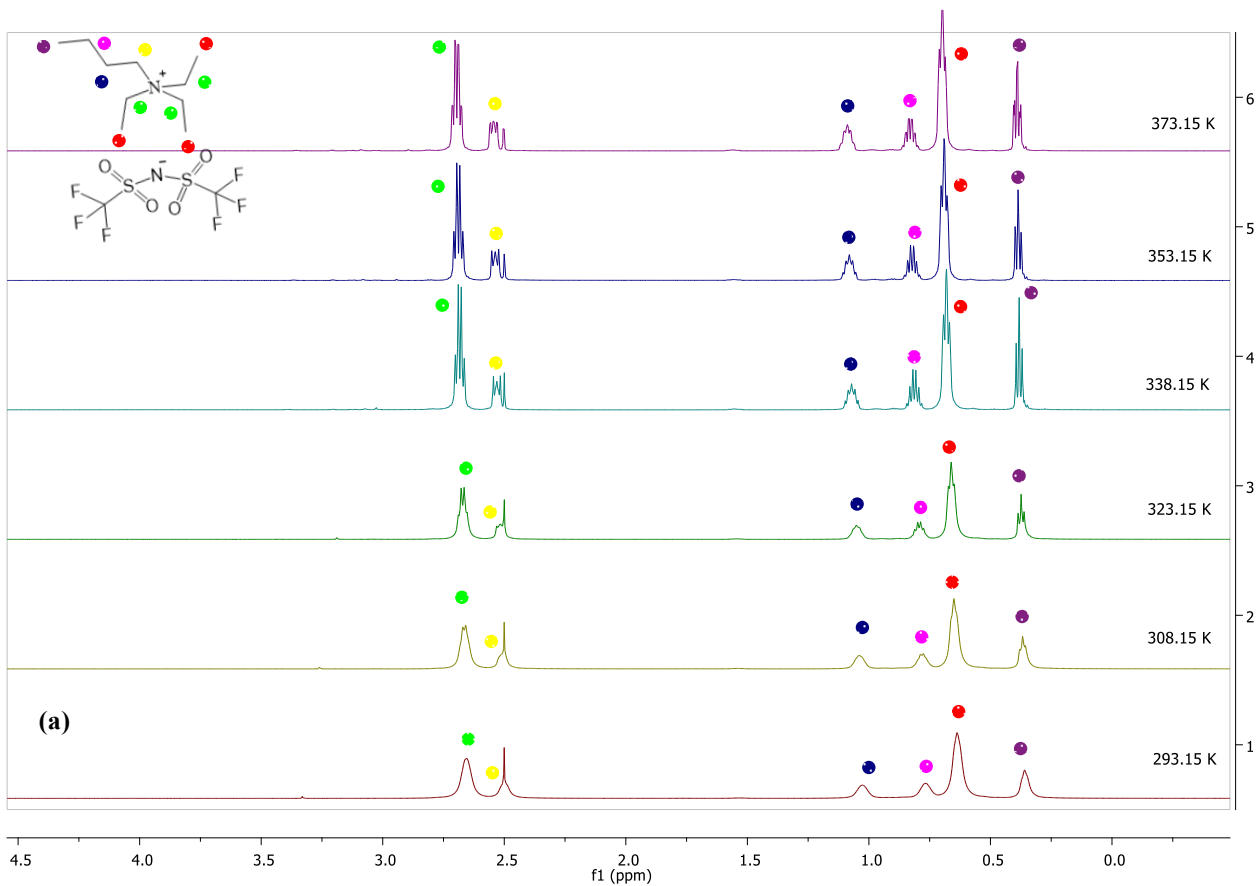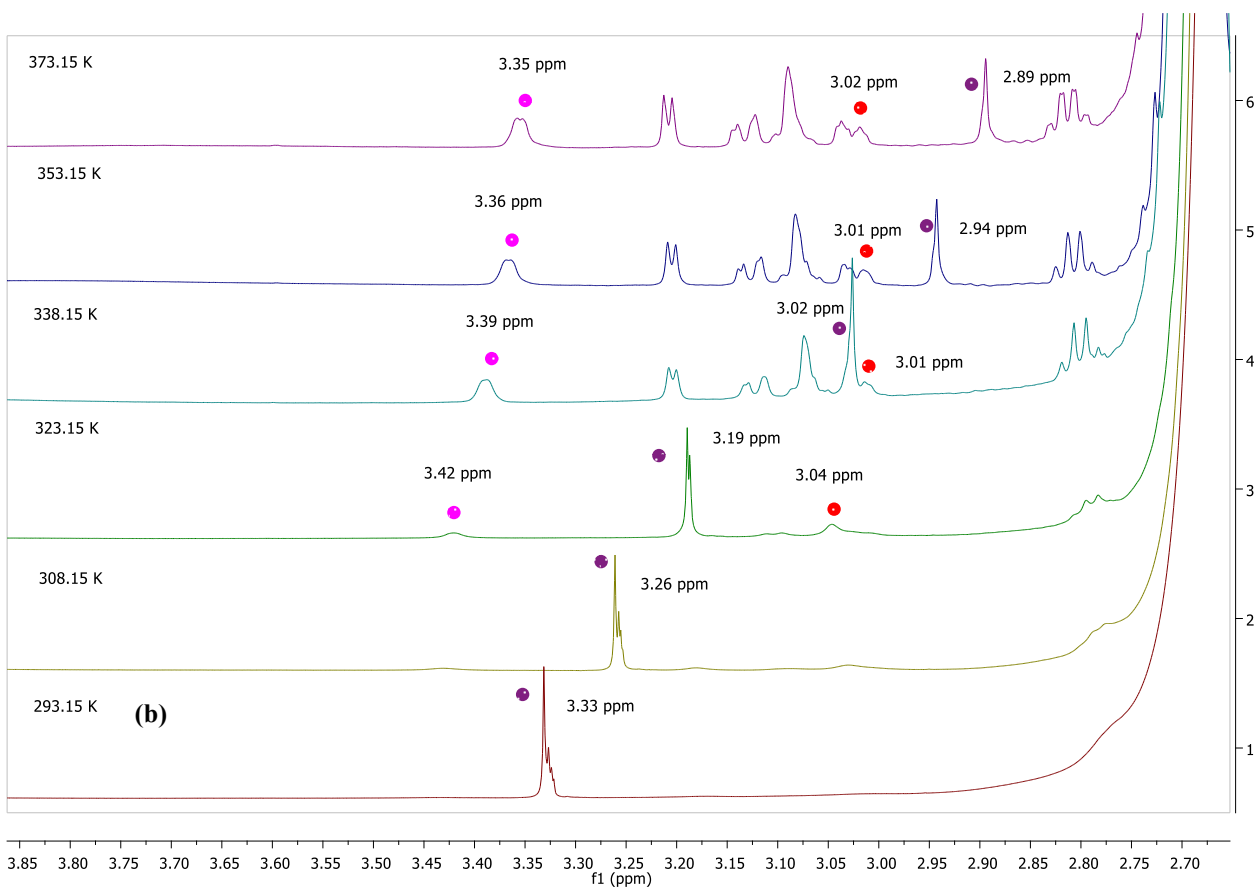

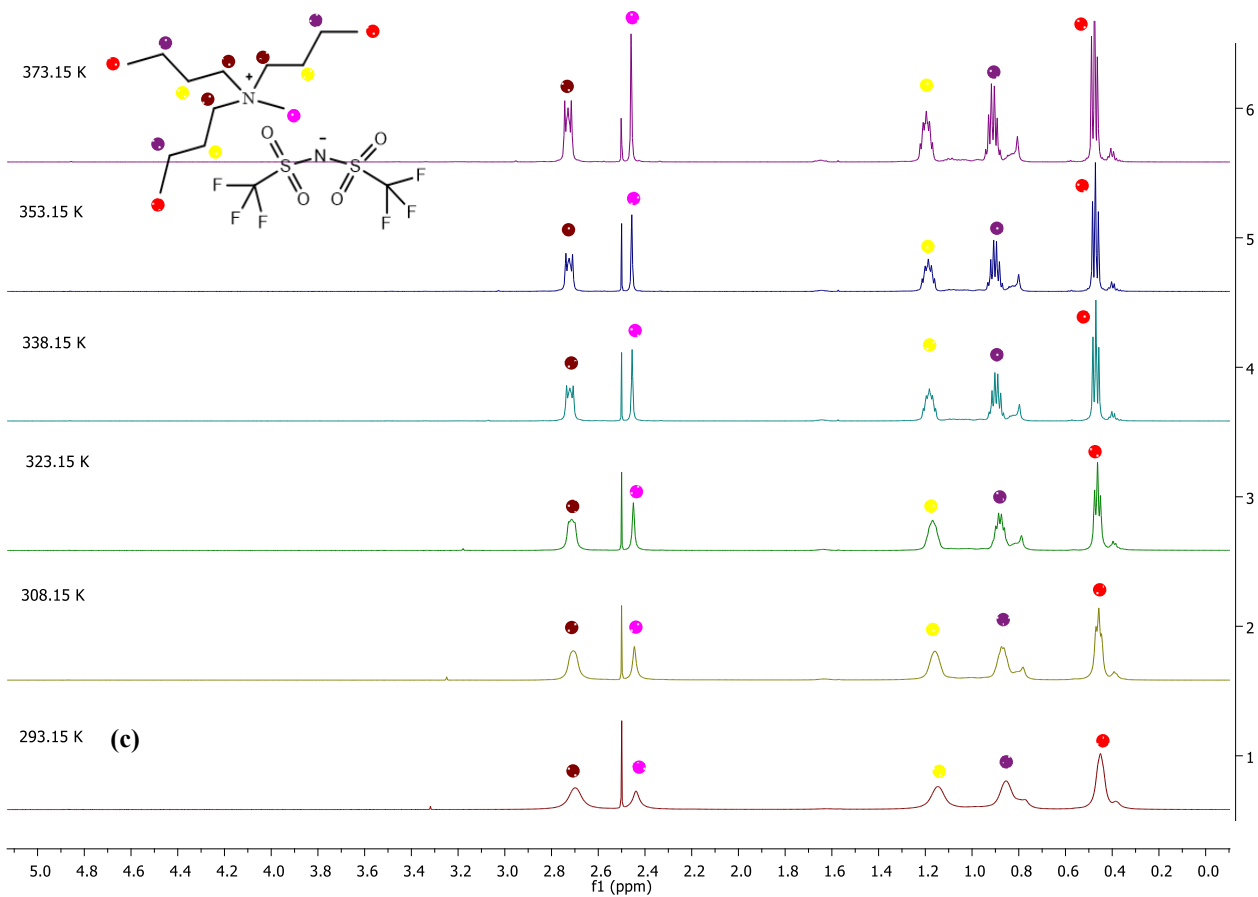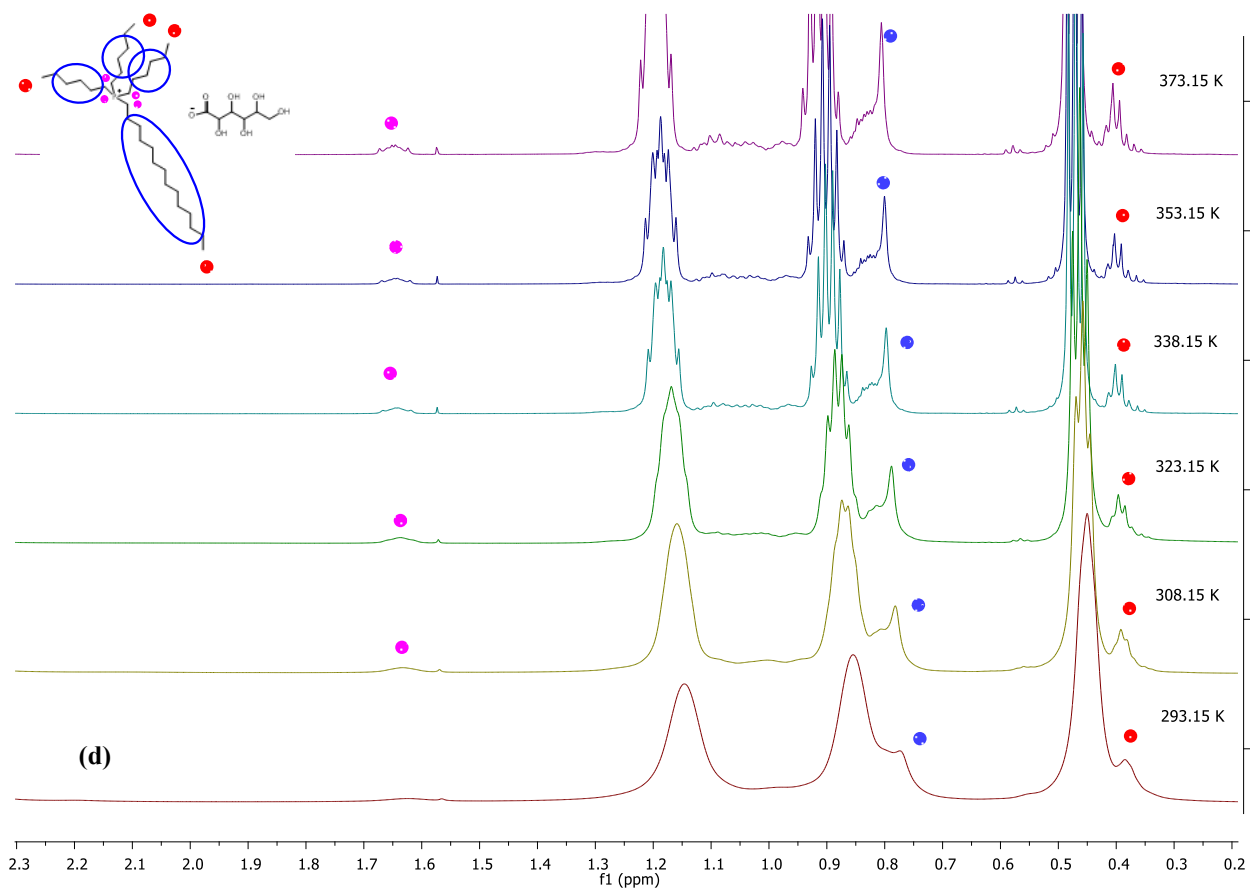

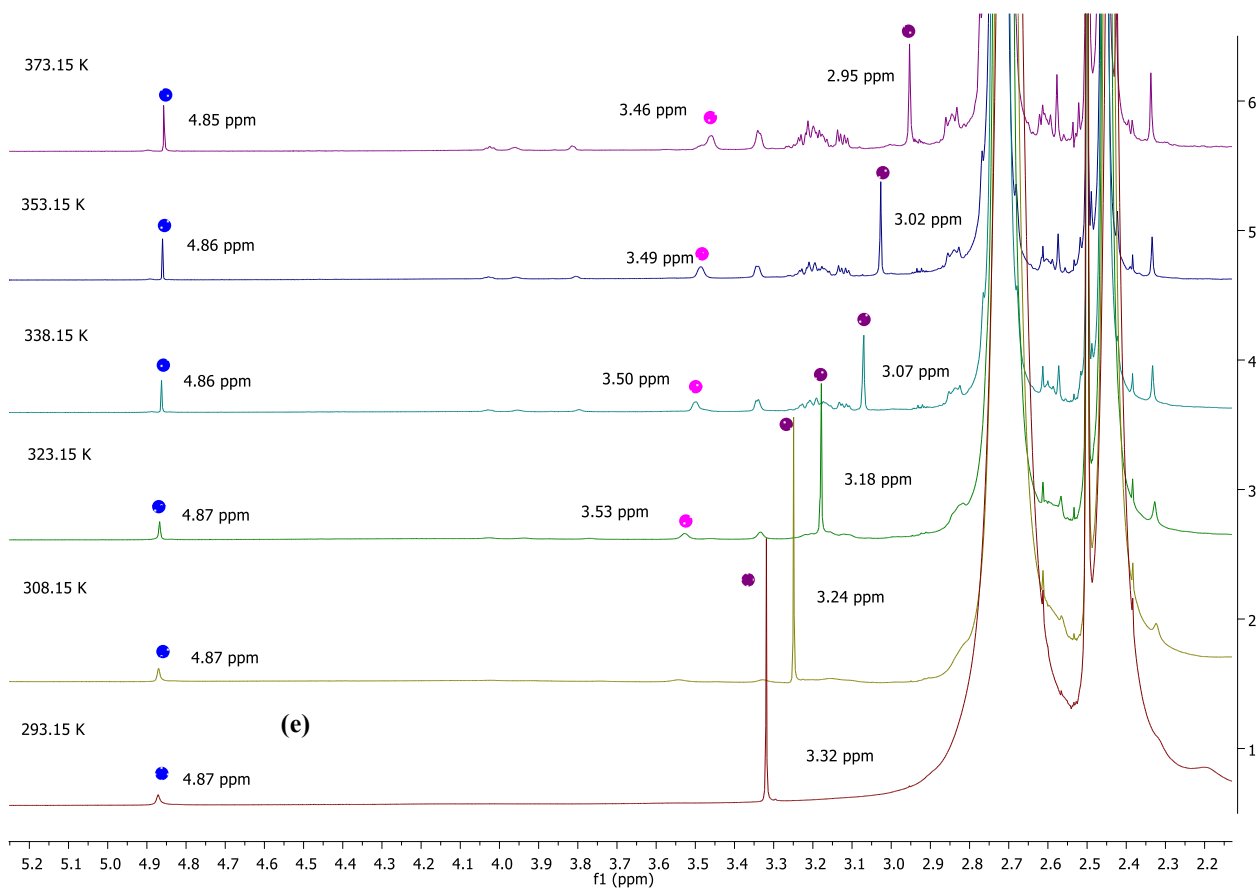

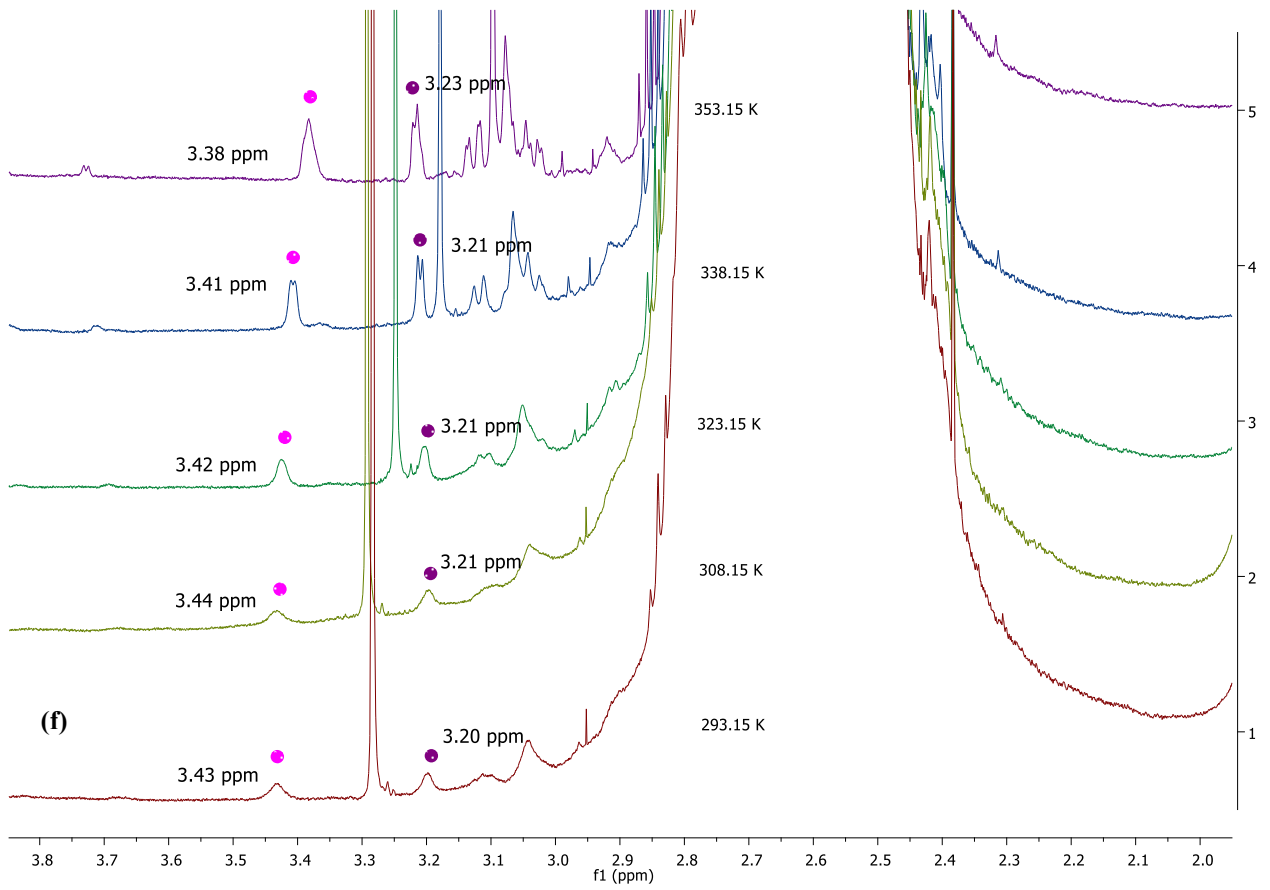



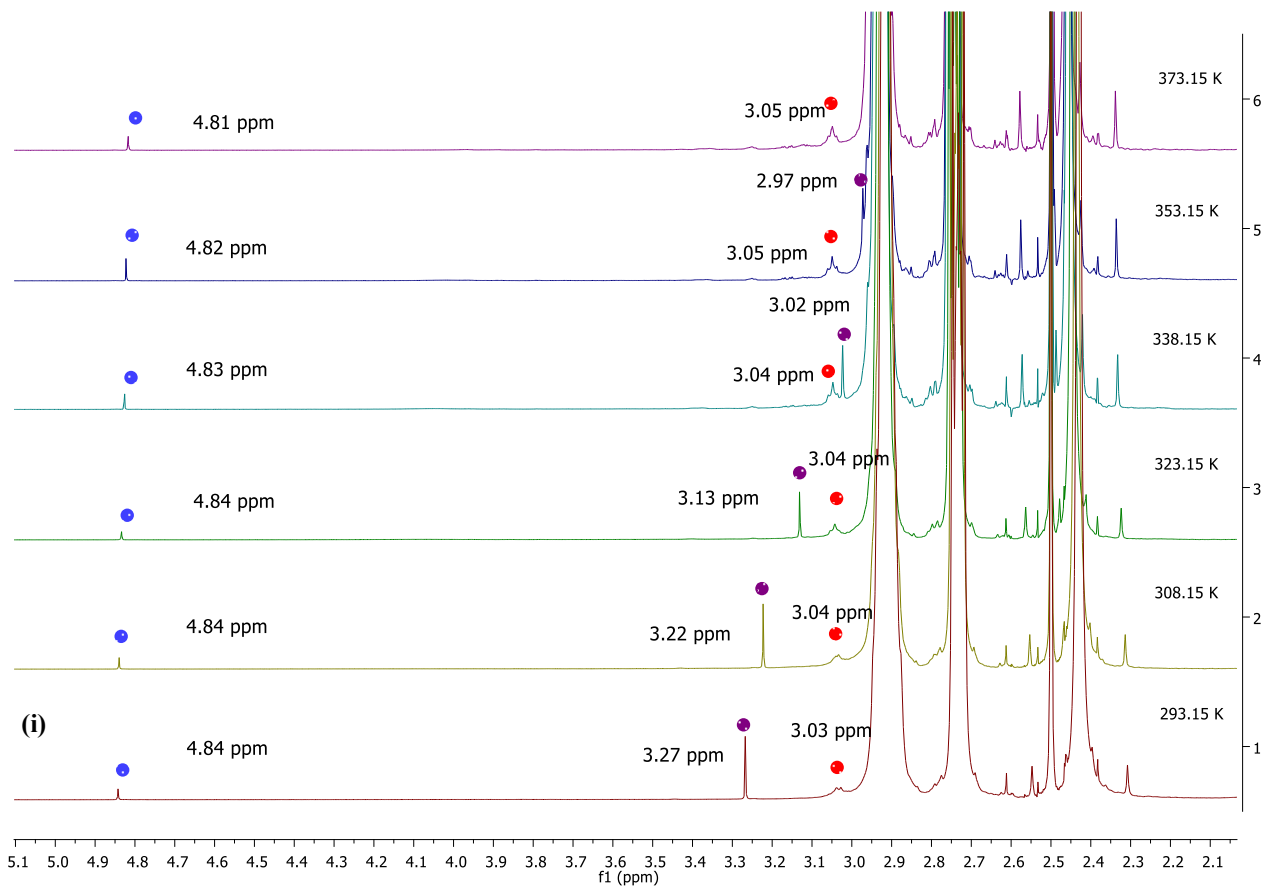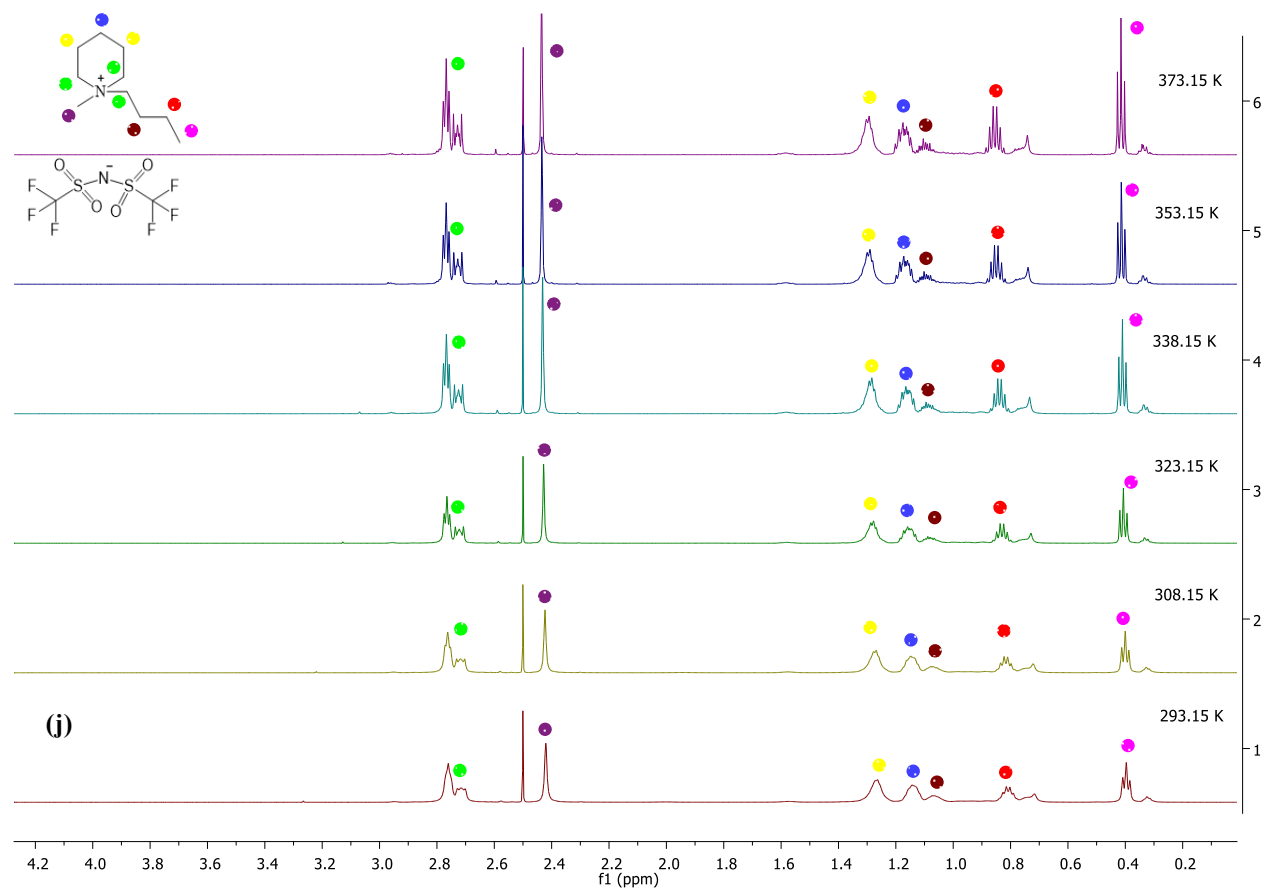

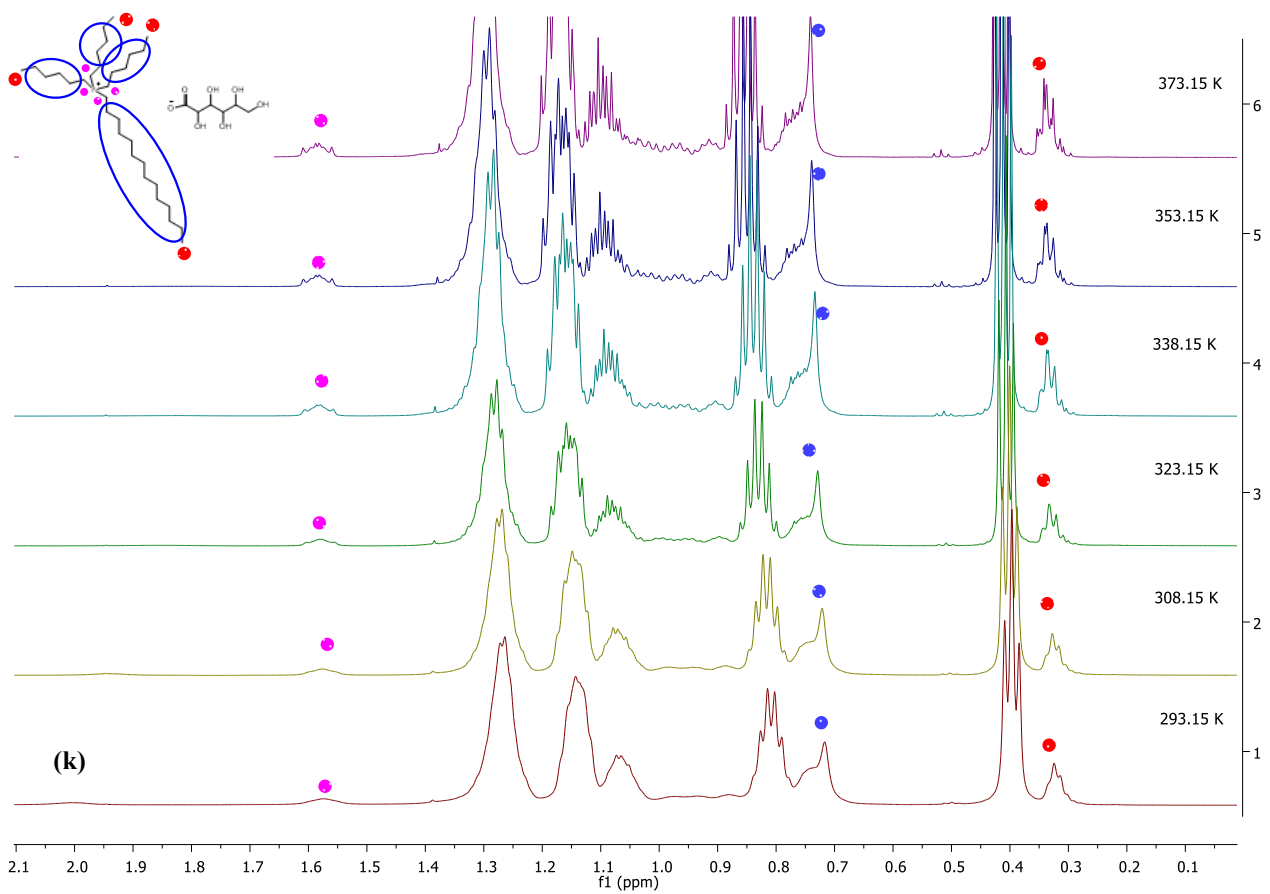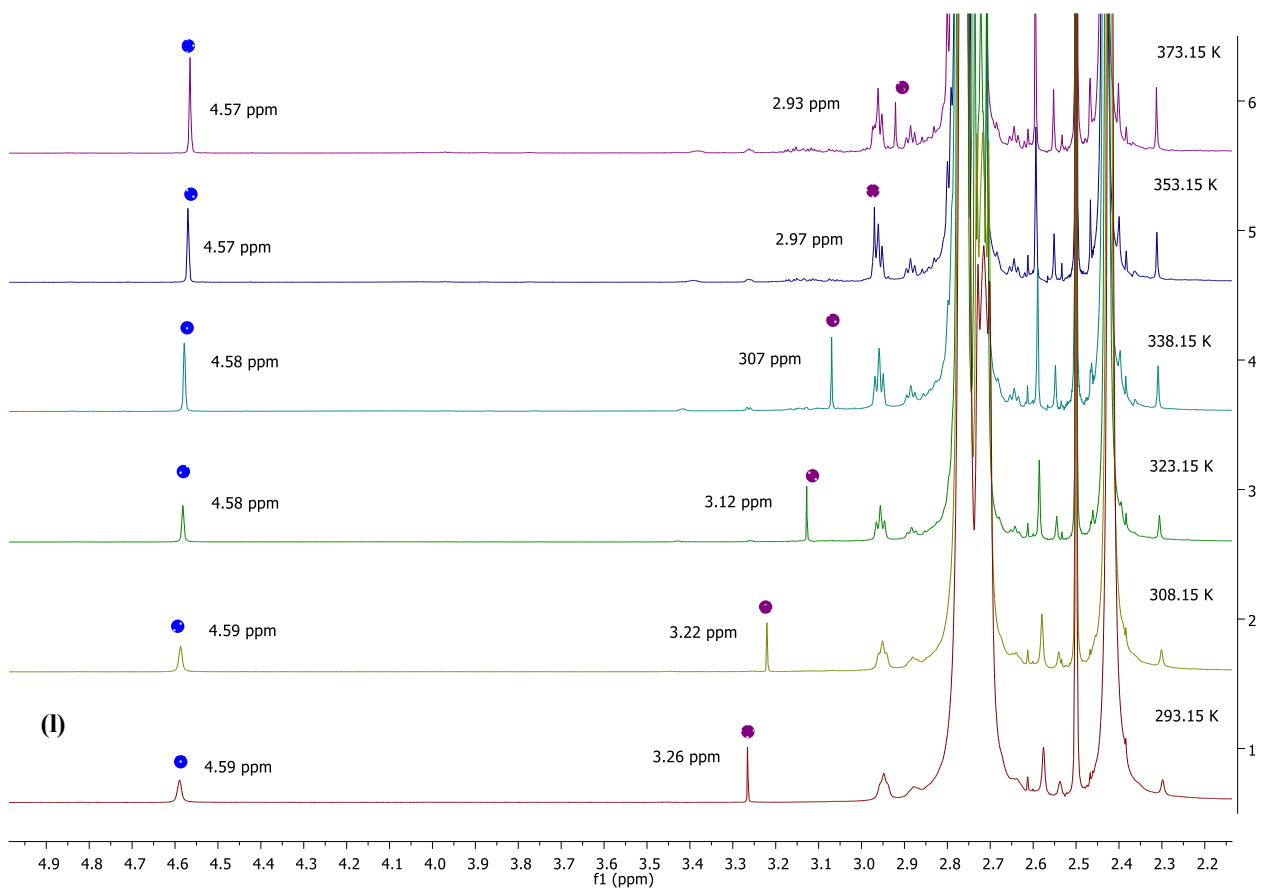



**Figure S6.**  $^1\text{H}$  NMR spectra of ILGs at 6.5% wt as a function of temperature for: (a)  $[\text{P}_{4444}][\text{Glu}]/[\text{N}_{2224}][\text{NTf}_2]$ ; (b)  $[\text{P}_{4444}][\text{Glu}]/[\text{N}_{2224}][\text{NTf}_2]$  enlarged region between 2.60-3.85 ppm; (c)  $[\text{P}_{66614}][\text{Glu}]/[\text{N}_{1444}][\text{NTf}_2]$ ; (d)  $[\text{P}_{66614}][\text{Glu}]/[\text{N}_{1444}][\text{NTf}_2]$  enlarged region between 0.2-2.3 ppm; (e)  $[\text{P}_{66614}][\text{Glu}]/[\text{N}_{1444}][\text{NTf}_2]$  enlarged region between 2.2-5.2 ppm; (f)  $[\text{P}_{66614}][\text{Glu}]/[\text{N}_{2224}][\text{NTf}_2]$  enlarged region between 2.0-3.8 ppm; (g)  $[\text{P}_{66614}][\text{Glu}]/[\text{C}_1\text{C}_4\text{pyrr}][\text{NTf}_2]$ ; (h)  $[\text{P}_{66614}][\text{Glu}]/[\text{C}_1\text{C}_4\text{pyrr}][\text{NTf}_2]$  enlarged region between 0.1-2.2 ppm; (i)  $[\text{P}_{66614}][\text{Glu}]/[\text{C}_1\text{C}_4\text{pyrr}][\text{NTf}_2]$  enlarged region between 2.1-5.1 ppm; (j)  $[\text{P}_{66614}][\text{Glu}]/[\text{C}_1\text{C}_4\text{pip}][\text{NTf}_2]$ ; (k)  $[\text{P}_{66614}][\text{Glu}]/[\text{C}_1\text{C}_4\text{pip}][\text{NTf}_2]$  enlarged region between 0.1-2.1 ppm; (l)  $[\text{P}_{66614}][\text{Glu}]/[\text{C}_1\text{C}_4\text{pip}][\text{NTf}_2]$  enlarged region between 2.2-4.9 ppm.

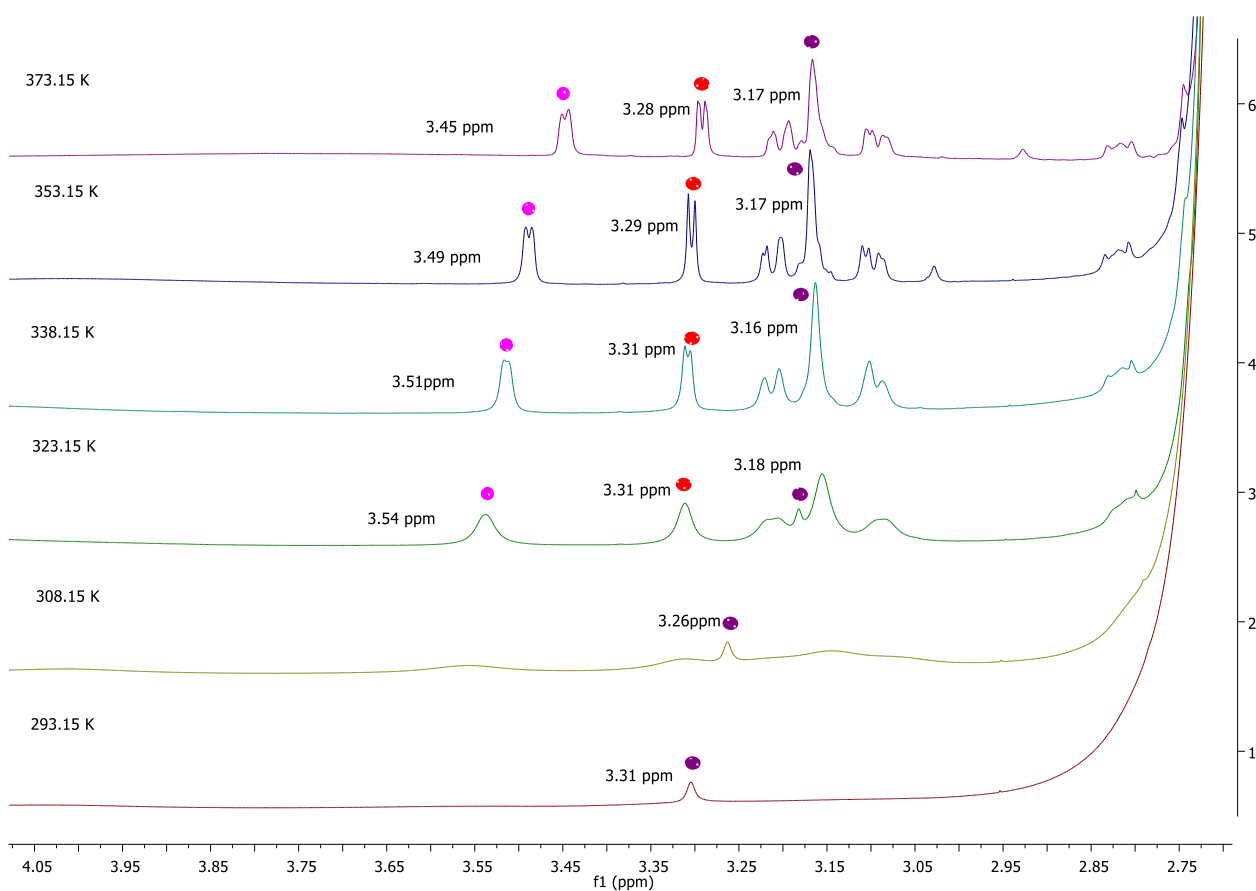

**Figure S7.** Enlarged region of  $^1\text{H}$  NMR spectra of  $[\text{P}_{4444}][\text{Glu}]/[\text{N}_{1444}][\text{NTf}_2]$  at 3.0 % wt as a function of temperature.

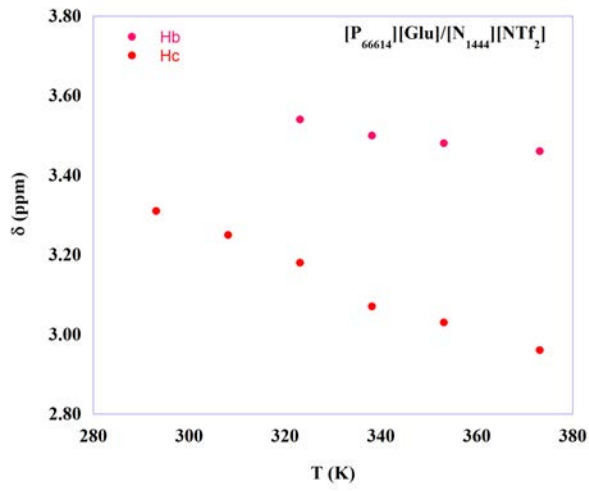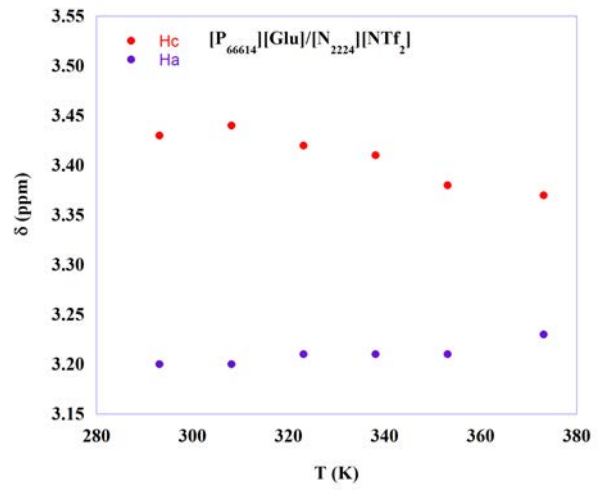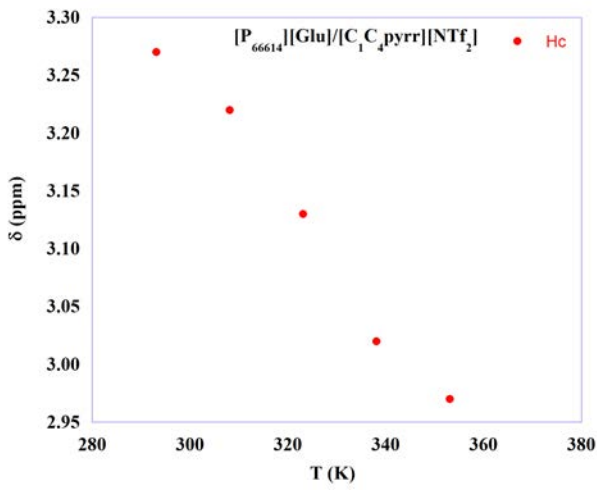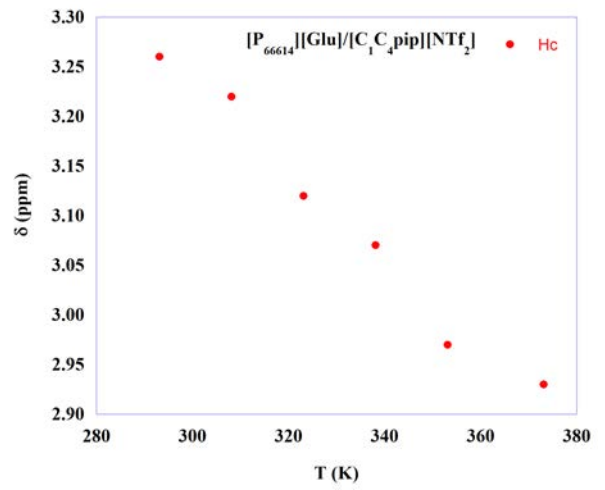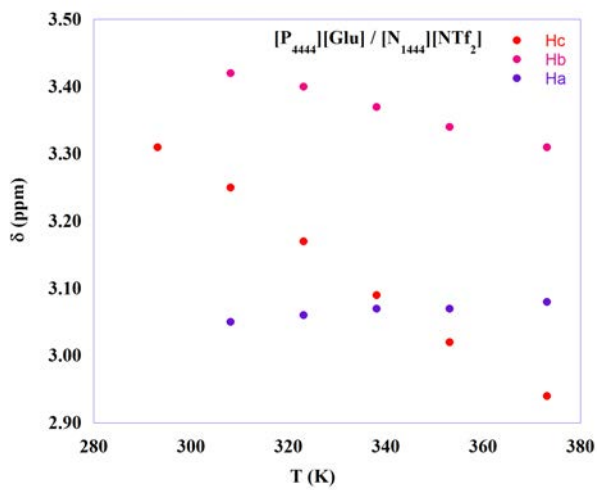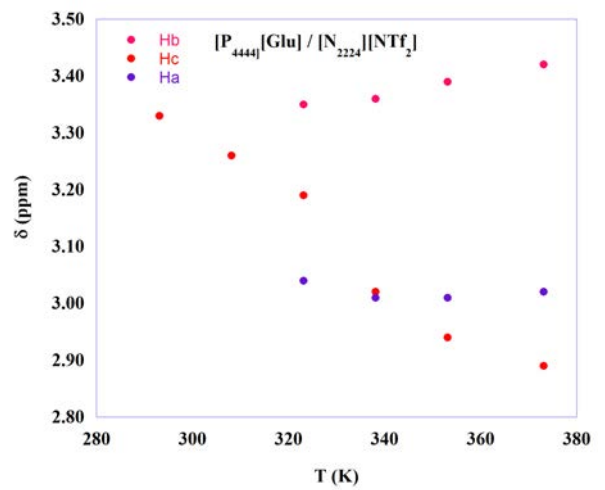

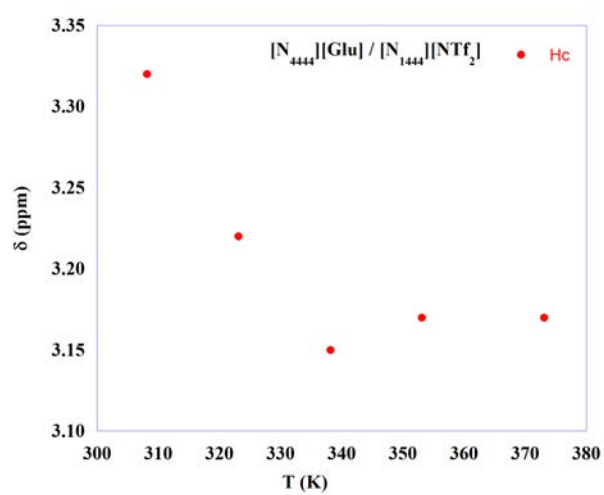

**Figure S8.** Changes in chemical shift as a function of the temperature for the ILGs.

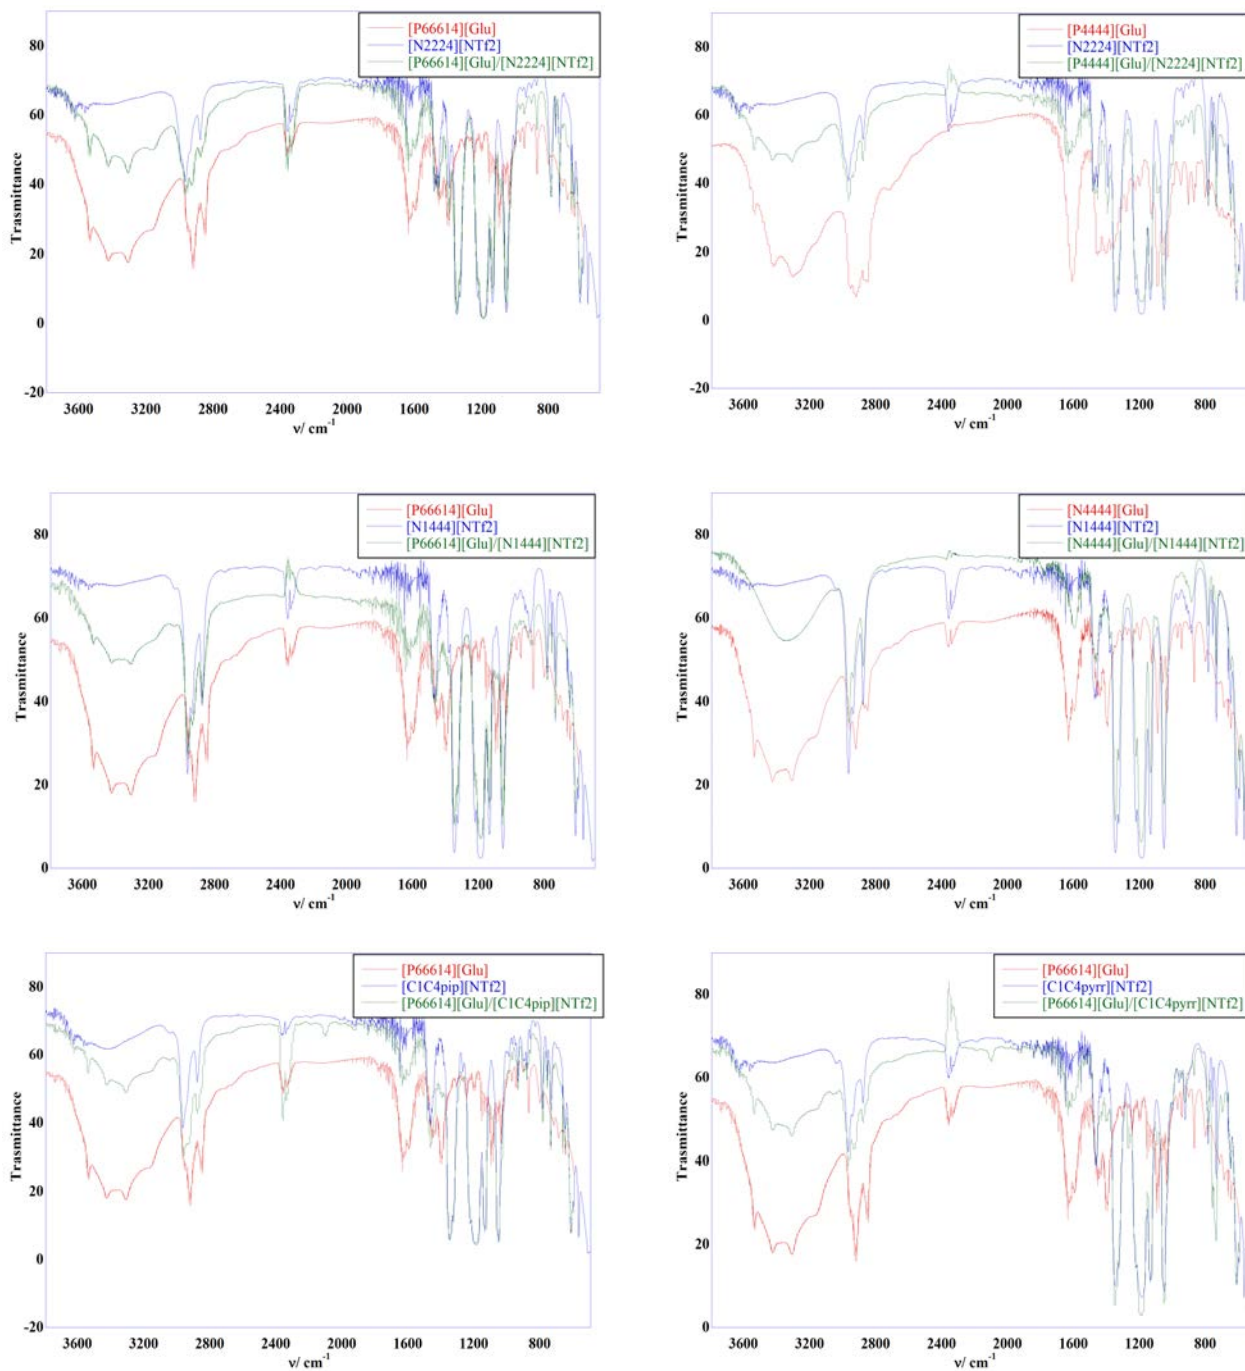

**Figure S9.** FT-IR spectra for neat gelator, ionic liquid and corresponding ILG at 6.5 % wt of gelator.

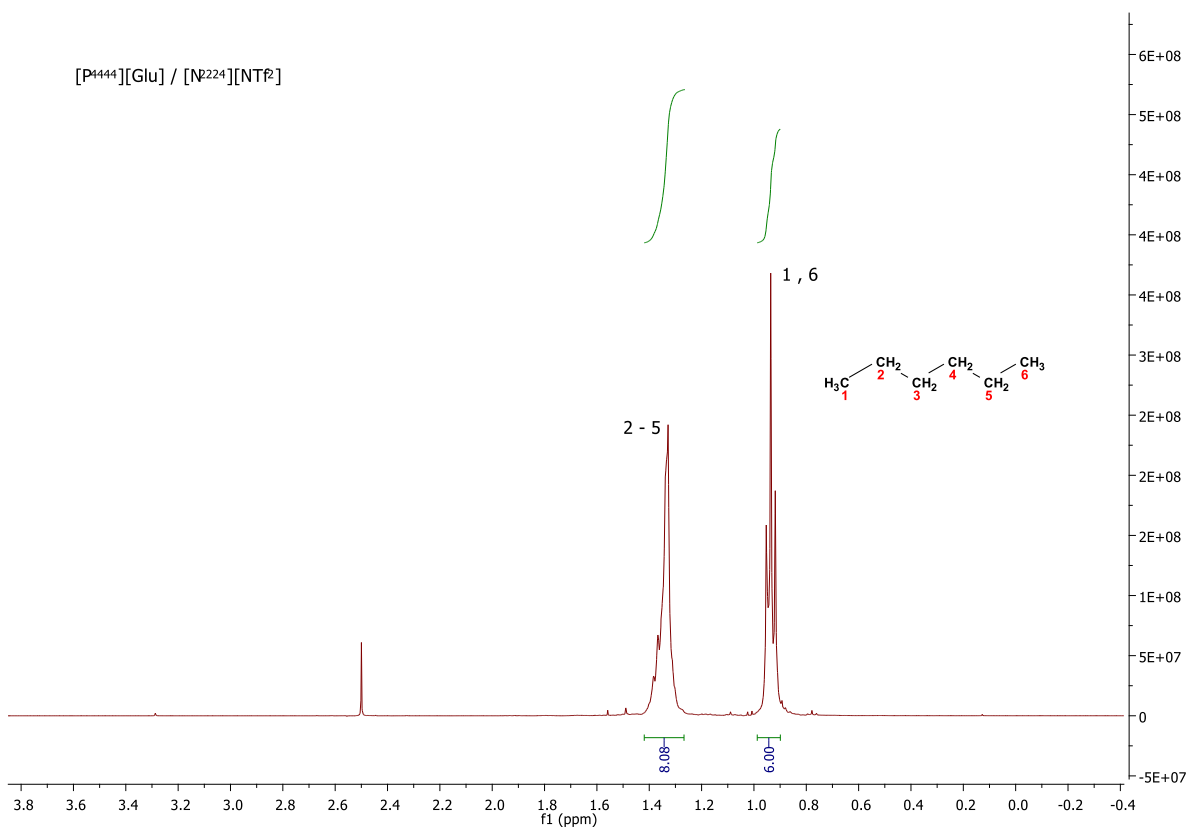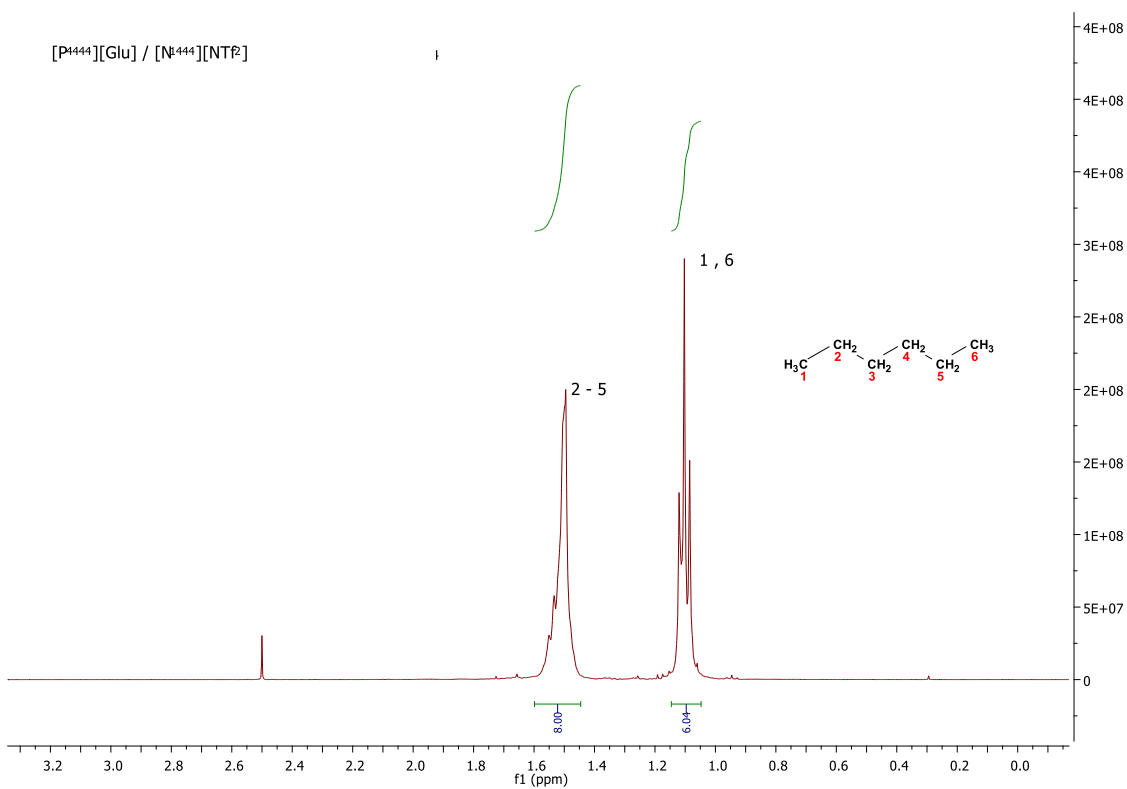

**Figure S10.** <sup>1</sup>H NMR spectra of hexane solution after 7h of contact time with [P<sup>4444</sup>][Glu]/[N<sup>2224</sup>][NTf<sub>2</sub>] (top) and [P<sup>4444</sup>][Glu]/[N<sup>1444</sup>][NTf<sub>2</sub>] (bottom).

[P<sup>4444</sup>][Glu] / [N<sup>224</sup>][NTf<sub>2</sub>]

(a)

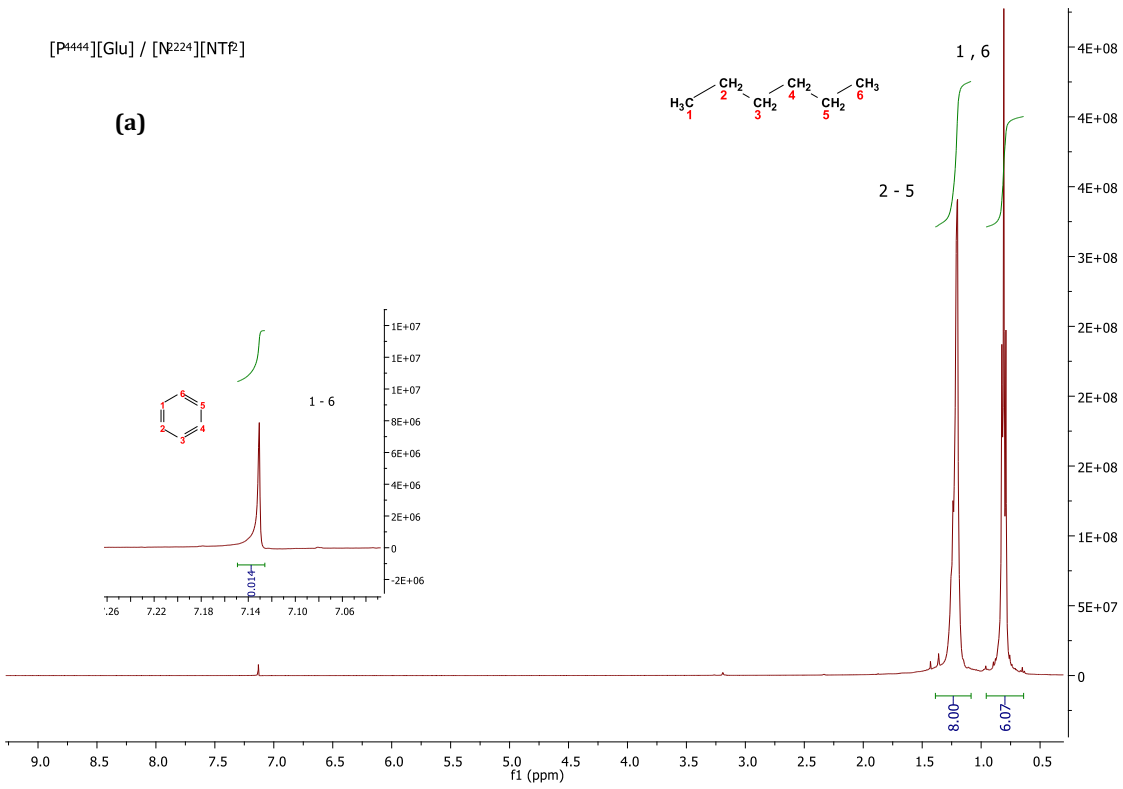

[P<sup>4444</sup>][Glu] / [N<sup>444</sup>][NTf<sub>2</sub>]

(b)

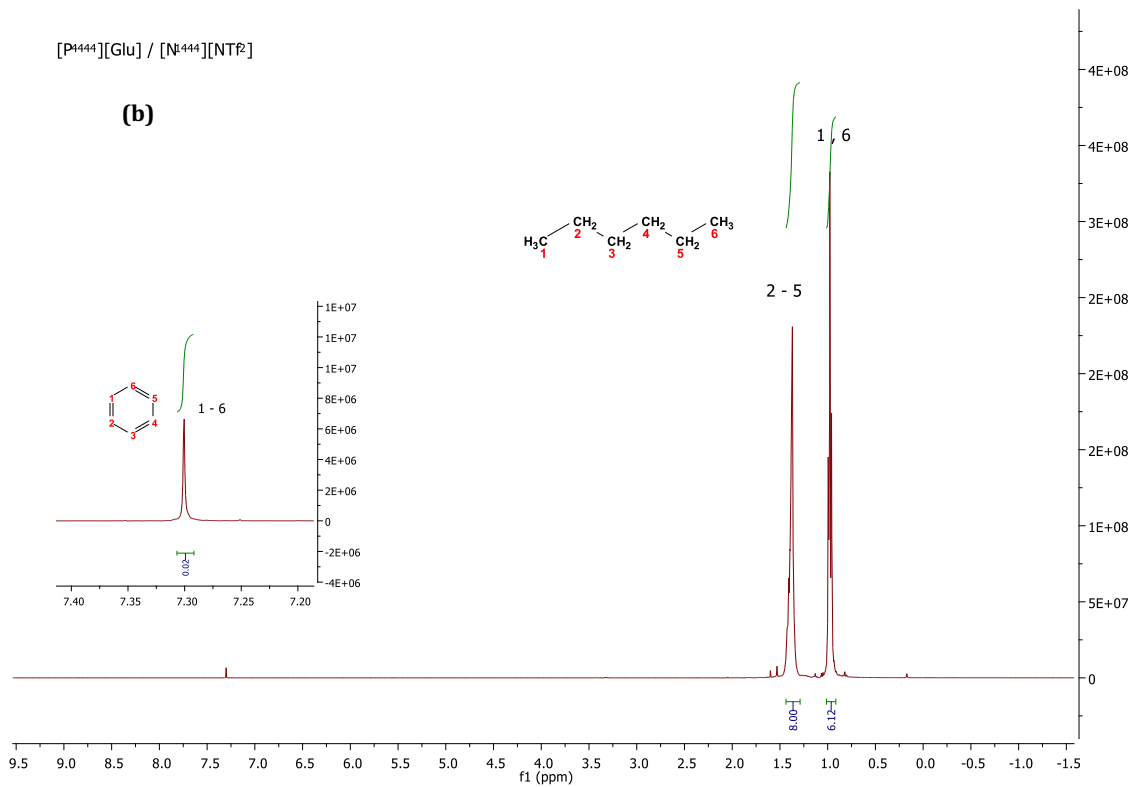

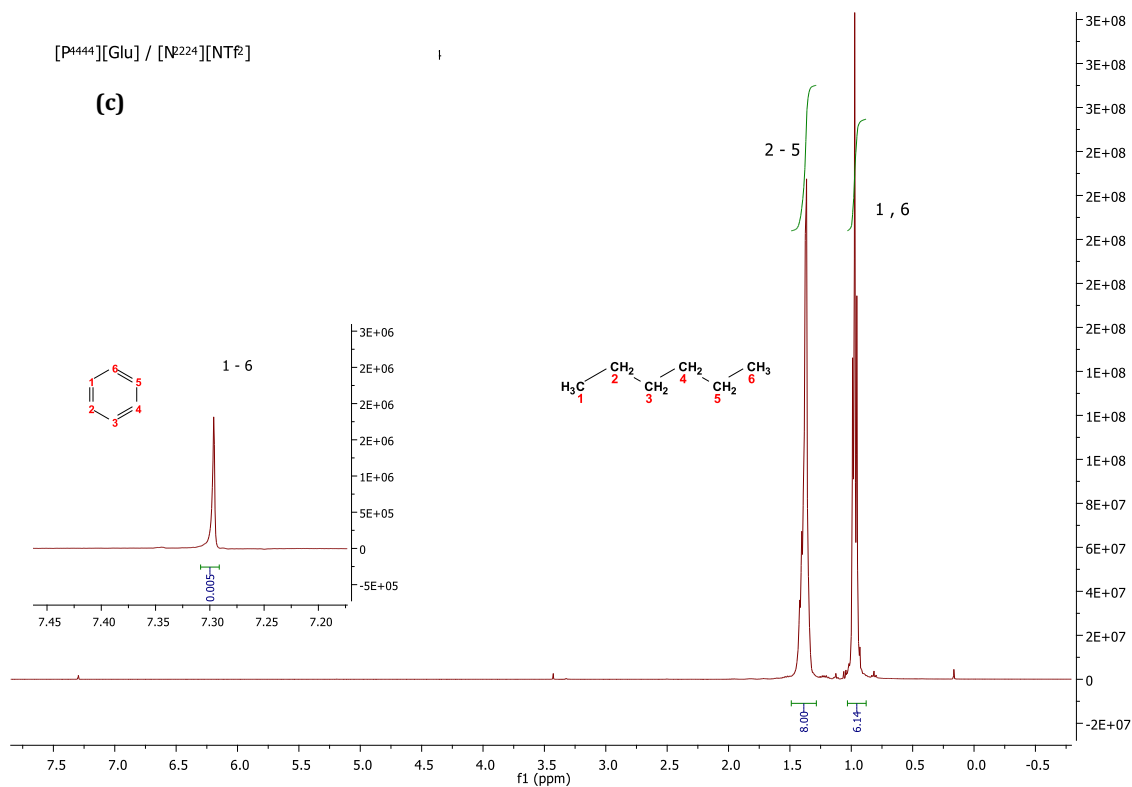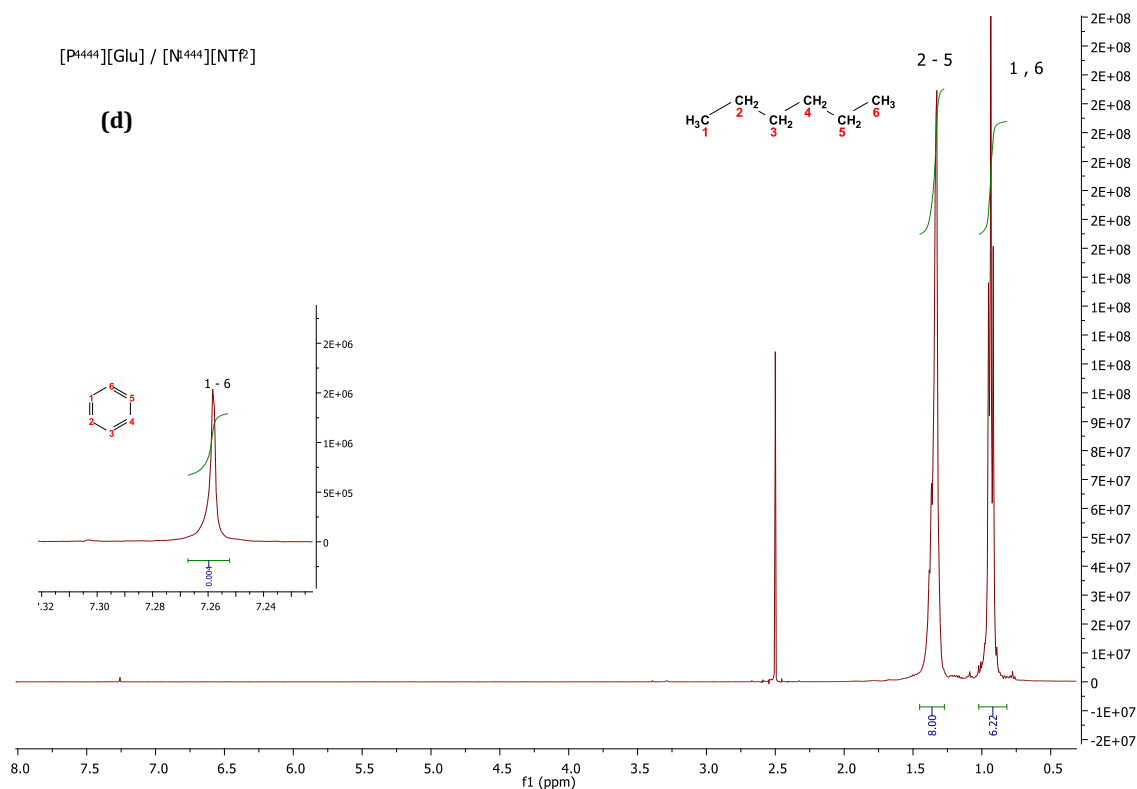

**Figure S11.**  $^1\text{H}$  NMR spectra of hexane solution of benzene at (a) - (b) 2000 ppm and (c) - (d) 500 ppm after 7h of contact time with [P4444][Glu]/[N2224][NTf<sub>2</sub>] or [P4444][Glu]/[N1444][NTf<sub>2</sub>] (inset spectra are intensity expanded to observe trace amount of benzene).

**Table S1.** Gelation tests performed in conventional solvents for the gelators used.

| Solvent            | C (wt%) | [P <sub>66614</sub> ][Glu] | [P <sub>4444</sub> ][Glu] | [N <sub>4444</sub> ][Glu] |
|--------------------|---------|----------------------------|---------------------------|---------------------------|
| methanol           | 1 - 3   | SC                         | SC                        | SC                        |
| ethanol            | 1 - 3   | SC                         | SC                        | SC                        |
| 1-propanol         | 1 - 3   | SC                         | SC                        | SC                        |
| 2-propanol         | 1 - 3   | SC                         | SC                        | SC                        |
| butanol            | 1 - 3   | SC                         | SC                        | SC                        |
| pentanol           | 1 - 3   | SC                         | SC                        | SC                        |
| hexanol            | 1 - 3   | SC                         | SC                        | SC                        |
| octanol            | 1 - 3   | SC                         | SC                        | SC                        |
| distilled water    | 1 - 3   | SC                         | SC                        | SC                        |
| sea water          | 1 - 3   | SC                         | SC                        | SC                        |
| 1,3-propanediol    | 1 - 3   | SC                         | SC                        | SC                        |
| triethylene glycol | 1 - 3   | SC                         | SC                        | SC                        |
| n-hexane           | 1 - 3   | I                          | I                         | I                         |
| n-heptane          | 1       | I                          | I                         | I                         |
| cyclohexane        | 1       | SC                         | SC                        | SC                        |
| petroleum ether    | 1       | SC                         | I                         | I                         |
| R-limonene         | 0.5 - 1 | I                          | I                         | I                         |
| ethyl lactate      | 1 - 3   | S                          | S                         | S                         |
| olive oil          | 1 - 5   | S                          | S                         | S                         |
| sweet corn oil     | 1 - 5   | S                          | S                         | S                         |
| mixed seeds oil    | 1 - 5   | I                          | I                         | I                         |
| silicon oil        | 1 - 5   | I                          | S                         | I                         |
| paraffin oil       | 1 - 5   | PG                         | S                         | I                         |
| engine oil         | 1 - 5   | S                          | S                         | S                         |
| diesel             | 1 - 5   | S                          | I                         | I                         |

S= soluble after heating; I= insoluble; SC= soluble without heating; PG= gel like precipitate.



**Table S2.** Stretching frequencies corresponding to gelator ( $\nu_{\text{gelator}}$ ) and ILGs ( $\nu_{\text{ILG}}$ ) and changes in stretching frequencies ( $\Delta\nu$ ) on going from gelator to gel phase.

| <b>Ionogel</b>                                                                    | <b><math>\nu_{\text{gelator}} / \text{cm}^{-1}</math></b> | <b><math>\nu_{\text{ILG}} / \text{cm}^{-1}</math></b> | <b><math>\Delta\nu / \text{cm}^{-1}</math></b> |
|-----------------------------------------------------------------------------------|-----------------------------------------------------------|-------------------------------------------------------|------------------------------------------------|
| <b>[P<sub>66614</sub>][Glu]/[N<sub>1444</sub>][NTf<sub>2</sub>]</b>               | 3540                                                      | 3540                                                  | 0                                              |
|                                                                                   | 3428                                                      | 3428                                                  | 3                                              |
|                                                                                   | 3306                                                      | 3314                                                  | -8                                             |
|                                                                                   | 3161                                                      | 3166                                                  | -5                                             |
|                                                                                   | 1618                                                      | 1618                                                  | 12                                             |
|                                                                                   | 1448                                                      | 1462                                                  | -14                                            |
|                                                                                   | 1398                                                      | 1348                                                  | 50                                             |
|                                                                                   |                                                           |                                                       |                                                |
| <b>[P<sub>66614</sub>][Glu]/[N<sub>2224</sub>][NTf<sub>2</sub>]</b>               | 3540                                                      | 3540                                                  | 0                                              |
|                                                                                   | 3431                                                      | 3428                                                  | 3                                              |
|                                                                                   | 3306                                                      | 3314                                                  | -8                                             |
|                                                                                   | 3161                                                      | 3166                                                  | -7                                             |
|                                                                                   | 1630                                                      | 1621                                                  | 9                                              |
|                                                                                   | 1448                                                      | 1460                                                  | -12                                            |
|                                                                                   | 1398                                                      | 1352                                                  | 46                                             |
|                                                                                   |                                                           |                                                       |                                                |
| <b>[P<sub>66614</sub>][Glu]/[C<sub>1</sub>C<sub>4</sub>pyrr][NTf<sub>2</sub>]</b> | 3540                                                      | 3545                                                  | -5                                             |
|                                                                                   | 3431                                                      | 3428                                                  | 3                                              |
|                                                                                   | 3306                                                      | 3311                                                  | -5                                             |
|                                                                                   | 3161                                                      | 3166                                                  | -5                                             |
|                                                                                   | 2930                                                      | 2969                                                  | -39                                            |
|                                                                                   | 2860                                                      | 2883                                                  | -23                                            |
|                                                                                   | 1630                                                      | 1628                                                  | 2                                              |
|                                                                                   | 1448                                                      | 1467                                                  | -19                                            |
|                                                                                   | 1398                                                      | 1353                                                  | 45                                             |
|                                                                                   |                                                           |                                                       |                                                |
| <b>[P<sub>66614</sub>][Glu]/[C<sub>1</sub>C<sub>4</sub>pip][NTf<sub>2</sub>]</b>  | 3540                                                      | 3545                                                  | -5                                             |
|                                                                                   | 3431                                                      | 3428                                                  | 3                                              |
|                                                                                   | 3306                                                      | 3311                                                  | -5                                             |
|                                                                                   | 3161                                                      | 3166                                                  | 6                                              |
|                                                                                   | 2930                                                      | 2964                                                  | -34                                            |
|                                                                                   | 2860                                                      | 2880                                                  | -20                                            |
|                                                                                   | 1630                                                      | 1621                                                  | 9                                              |
|                                                                                   | 1448                                                      | 1469                                                  | -21                                            |
|                                                                                   |                                                           |                                                       |                                                |
|                                                                                   |                                                           |                                                       |                                                |

|                                                                    |      |      |     |
|--------------------------------------------------------------------|------|------|-----|
|                                                                    | 1398 | 1354 | 44  |
| <b>[P<sub>4444</sub>][Glu]/[N<sub>1444</sub>][NTf<sub>2</sub>]</b> | 3572 | 3629 | -57 |
|                                                                    | 3552 | 3554 | -2  |
|                                                                    | 3416 | 3433 | -17 |
|                                                                    | 3300 | 3312 | -12 |
|                                                                    | 3158 | 3166 | -8  |
|                                                                    | 2929 | 2970 | -41 |
|                                                                    | 2862 | 2870 | -8  |
|                                                                    | 1613 | 1638 | -25 |
| <b>[P<sub>4444</sub>][Glu]/[N<sub>2224</sub>][NTf<sub>2</sub>]</b> | 3572 | 3631 | -59 |
|                                                                    | 3552 | 3545 | 7   |
|                                                                    | 3416 | 3432 | -16 |
|                                                                    | 3300 | 3311 | -11 |
|                                                                    | 3158 | 3167 | -9  |
|                                                                    | 1613 | 1632 | -19 |
| <b>[N<sub>4444</sub>][Glu]/[N<sub>1444</sub>][NTf<sub>2</sub>]</b> | 3566 |      |     |
|                                                                    | 3444 | 3344 | -22 |
|                                                                    | 3322 |      |     |
|                                                                    | 2977 | 2977 | 0   |
|                                                                    | 2933 | 2877 | 56  |
|                                                                    | 2855 |      |     |
|                                                                    | 1638 | 1596 | 42  |
|                                                                    | 1602 |      |     |
|                                                                    | 1447 | 1463 | -16 |
|                                                                    | 1397 | 1353 | 44  |

---

**Table S3.** Adsorption efficiency (AE)<sup>a</sup> of sulphur compounds on ILGs at 6.5% wt of gelator and corresponding ILs at 20 °C.

| Adsorbent                                                                  | AE (%) T        |                 | AE (%) BT       |                 | AE (%) DBT      |                 |
|----------------------------------------------------------------------------|-----------------|-----------------|-----------------|-----------------|-----------------|-----------------|
|                                                                            | <i>t</i> = 24 h | <i>t</i> = 48 h | <i>t</i> = 24 h | <i>t</i> = 48 h | <i>t</i> = 24 h | <i>t</i> = 48 h |
| [N <sub>2224</sub> ][NTf <sub>2</sub> ]                                    | 83.7            | 87.0            | 56.2            | 56.9            | 57.2            | 54.7            |
| [P <sub>4444</sub> ][Glu]/ [N <sub>2224</sub> ][NTf <sub>2</sub> ]         | 49.5            | 60.4            | 57.7            | 67.2            | 46.8            | 68.0            |
| [P <sub>4444</sub> ][Glu]/ [N <sub>2224</sub> ][NTf <sub>2</sub> ] (30 °C) | 47.2            | 60.9            |                 |                 |                 |                 |
| [N <sub>1444</sub> ][NTf <sub>2</sub> ]                                    | 12.0            | 53.2            | 47.2            | 53.3            | 49.9            | 73.8            |
| [N <sub>4444</sub> ][Glu]/[N <sub>1444</sub> ][NTf <sub>2</sub> ]          | 22.9            | 86.4            | 45.0            | 52.8            | 27.5            | 46.2            |
| [P <sub>4444</sub> ][Glu]/[N <sub>1444</sub> ][NTf <sub>2</sub> ]          | 40.6            | 82.4            | 41.2            | 53.8            | 26.5            | 46.5            |
| [P <sub>4444</sub> ][Glu]/[N <sub>1444</sub> ][NTf <sub>2</sub> ] (30 °C)  | 57.6            | 65.3            |                 |                 |                 |                 |

<sup>a</sup>AE values were reproducible within ± 2 %.

**Table S4.** Adsorption efficiency (AE)<sup>a</sup> of sulphur compounds on [P<sub>4444</sub>][Glu]/[N<sub>2224</sub>][NTf<sub>2</sub>] at 6.5% wt of gelator as a function of the time at 20 °C.

| T        |        | BT       |        | DBT      |        |
|----------|--------|----------|--------|----------|--------|
| Time (h) | AE (%) | Time (h) | AE (%) | Time (h) | AE (%) |
| 2        | 8.2    | 1        | 14.2   | 1        | 18.7   |
| 4        | 21.3   | 2        | 15.6   | 2        | 18.3   |
| 6        | 32.8   | 3        | 19.8   | 3        | 17.6   |
| 7        | 33.7   | 5.5      | 23.8   | 4        | 29.1   |
| 8        | 42.1   | 6        | 30.7   | 6        | 37.8   |
| 16       | 50.9   | 7.5      | 36.7   | 7.5      | 38.8   |
| 19       | 49.8   | 9        | 39.5   | 8        | 40     |
| 22       | 47.9   | 15       | 41.6   | 15       | 39.4   |
| 24       | 48.8   | 18       | 40.3   | 18       | 41.4   |
|          |        | 21       | 47.8   | 21       | 46.1   |
|          |        | 24       | 57.7   | 24       | 46.8   |

<sup>a</sup>AE values were reproducible within ± 2 %.

**Table S5.** Adsorption efficiency (AE)<sup>a</sup> of sulphur compounds on [P<sub>4444</sub>][Glu]/[N<sub>1444</sub>][NTf<sub>2</sub>] at 6.5% wt of gelator as a function of the time at 20 °C.

| T        |        | BT       |        | DBT      |        |
|----------|--------|----------|--------|----------|--------|
| Time (h) | AE (%) | Time (h) | AE (%) | Time (h) | AE (%) |
| 1        | 0      | 1        | 26.8   | 1        | 6.9    |
| 2        | 10.5   | 2        | 27.0   | 2        | 5.2    |
| 3        | 22.5   | 3        | 25.9   | 3        | 9.3    |
| 4        | 23.8   | 4        | 24.4   | 4        | 17     |
| 6        | 22.6   | 5        | 24.2   | 6        | 17     |
| 8        | 21.6   | 6        | 28.2   | 8        | 18.6   |
| 9        | 24.5   | 7        | 30.3   | 9        | 19.7   |
| 15       | 29     | 8        | 31.7   | 16       | 27.0   |
| 17       | 27.8   | 9        | 31.0   | 19       | 29.4   |
| 19       | 32.2   | 15       | 32.6   | 22       | 27.5   |
| 22       | 36.9   | 17       | 36.3   | 24       | 26.5   |
| 24       | 40.6   | 19       | 40.0   |          |        |
|          |        | 23       | 45.0   |          |        |
|          |        | 24       | 41.0   |          |        |

<sup>a</sup>AE values were reproducible within  $\pm 2$  %.

**Table S6.** Adsorption efficiency (AE)<sup>a</sup> of sulphur compounds on ILGs at 6.5% wt of gelator, using solution of single components (C = 1500 ppm) or mixed solutions (C = 1500 ppm), at 20 °C.

|        | [P <sub>4444</sub> ][Glu]/[N <sub>2224</sub> ][NTf <sub>2</sub> ] |      |      | [P <sub>4444</sub> ][Glu]/[N <sub>1444</sub> ][NTf <sub>2</sub> ] |      |      |
|--------|-------------------------------------------------------------------|------|------|-------------------------------------------------------------------|------|------|
|        | AE (%)                                                            |      |      | AE (%)                                                            |      |      |
|        | T                                                                 | BT   | DBT  | T                                                                 | BT   | DBT  |
| Single | 42.6                                                              | 54.5 | 51.2 | 42.6                                                              | 54.5 | 51.2 |
| Mix    | 58.1                                                              | 78.0 | 78.2 | 15.0                                                              | 58.1 | 55.7 |

<sup>a</sup>AE values were reproducible within  $\pm 2$  %.

**Table S7.** Adsorption efficiency (AE)<sup>a</sup> of sulphur compounds on ILGs at 6.5% wt of gelator, as a function of concentration of sulphur compounds, at 20 °C.

| C <sub>T,BT,DBT</sub> (ppm) | [P <sub>4444</sub> ][Glu]/ [N <sub>2224</sub> ][NTf <sub>2</sub> ] |      |      | [P <sub>4444</sub> ][Glu]/[N <sub>1444</sub> ][NTf <sub>2</sub> ] |      |      |
|-----------------------------|--------------------------------------------------------------------|------|------|-------------------------------------------------------------------|------|------|
|                             | AE (%)                                                             |      |      | AE (%)                                                            |      |      |
|                             | T                                                                  | BT   | DBT  | T                                                                 | BT   | DBT  |
| 900                         | 51.3                                                               | 53.9 | 54.0 | 0                                                                 | 25.7 | 34.3 |
| 1500                        | 58.1                                                               | 78.0 | 78.2 | 15.0                                                              | 58.1 | 55.7 |
| 2250                        | 62.2                                                               | 72.8 | 72.9 | 31.5                                                              | 68.3 | 73.2 |
| 3000                        | 67.4                                                               | 76.9 | 81.2 | 56.2                                                              | 72.6 | 71.4 |

<sup>a</sup>AE values were reproducible within ± 2 %.

**Table S8.** Adsorption efficiency (AE)<sup>a</sup> of sulphur compounds on ionic liquid gels, at 6.5% wt of gelator, as a function of fuel volume (C = 1500 ppm), at 20 °C.

| V (μL) | [P <sub>4444</sub> ][Glu]/ [N <sub>2224</sub> ][NTf <sub>2</sub> ] |      |      | [P <sub>4444</sub> ][Glu]/[N <sub>1444</sub> ][NTf <sub>2</sub> ] |      |      |
|--------|--------------------------------------------------------------------|------|------|-------------------------------------------------------------------|------|------|
|        | AE (%)                                                             |      |      | AE (%)                                                            |      |      |
|        | T                                                                  | BT   | DBT  | T                                                                 | BT   | DBT  |
| 300    | 68.1                                                               | 84.0 | 84.2 | 27.0                                                              | 52.1 | 51.0 |
| 400    | 69.1                                                               | 80.6 | 82.5 | 26.0                                                              | 53.1 | 56.2 |
| 500    | 58.1                                                               | 78.0 | 78.2 | 15.0                                                              | 58.1 | 55.7 |
| 700    | 43.4                                                               | 46.6 | 60.6 | 0                                                                 | 50.2 | 50.2 |

<sup>a</sup>AE values were reproducible within ± 2 %.

**Table S9.** Adsorption efficiency (AE)<sup>a</sup> of sulphur compounds (C = 1500 ppm) on ILGs, at 6.5% wt of gelator, as a function of vial diameter, at 20 °C.

| d (cm) | [P <sub>4444</sub> ][Glu]/ [N <sub>2224</sub> ][NTf <sub>2</sub> ] |      |      | [P <sub>4444</sub> ][Glu]/[N <sub>1444</sub> ][NTf <sub>2</sub> ] |      |      |
|--------|--------------------------------------------------------------------|------|------|-------------------------------------------------------------------|------|------|
|        | AE (%)                                                             |      |      | AE (%)                                                            |      |      |
|        | T                                                                  | BT   | DBT  | T                                                                 | BT   | DBT  |
| 0.5    | 58.1                                                               | 78.0 | 78.2 | 15.0                                                              | 58.1 | 55.7 |
| 1      | 13.8                                                               | 46.0 | 47.2 | 10                                                                | 40.8 | 42.6 |

<sup>a</sup>AE values were reproducible within ± 2 %.

**Table S10.** Adsorption efficiency (AE)<sup>a</sup> of sulphur compounds (C = 1500 ppm) on ILGs, at 6.5% wt of gelator, using different ways of use, at 20 °C.

| [P <sub>4444</sub> ][Glu]/ [N <sub>2224</sub> ][NTf <sub>2</sub> ] |      |      | [P <sub>4444</sub> ][Glu]/[N <sub>1444</sub> ][NTf <sub>2</sub> ] |      |      |
|--------------------------------------------------------------------|------|------|-------------------------------------------------------------------|------|------|
| AE (%)                                                             |      |      | AE (%)                                                            |      |      |
| T                                                                  | BT   | DBT  | T                                                                 | BT   | DBT  |
| 58.1                                                               | 78.0 | 78.2 | 15.0                                                              | 58.1 | 55.7 |

<sup>a</sup>AE values were reproducible within ± 2 %.

**Table S11.** Adsorption efficiency (AE)<sup>a</sup> of sulphur compounds (C = 1500 ppm) on ILGs, at 6.5% wt of gelator, after different cycles of reuse, at 20 °C.

|           | [P <sub>4444</sub> ][Glu]/ [N <sub>2224</sub> ][NTf <sub>2</sub> ] |      |      | [P <sub>4444</sub> ][Glu]/[N <sub>1444</sub> ][NTf <sub>2</sub> ] |      |      |
|-----------|--------------------------------------------------------------------|------|------|-------------------------------------------------------------------|------|------|
|           | AE (%)                                                             |      |      | AE (%)                                                            |      |      |
|           | T                                                                  | BT   | DBT  | T                                                                 | BT   | DBT  |
| I cycle   | 58.1                                                               | 78.0 | 78.7 | 15.0                                                              | 58.1 | 55.7 |
| II cycle  | 26.5                                                               | 36.2 | 36.2 | 25.5                                                              | 42.0 | 40.2 |
| III cycle | 32.0                                                               | 31.1 | 31.4 | 24.4                                                              | 38.7 | 41.3 |
| IV        | 23.3                                                               | 17.0 | 16.3 | 19.2                                                              | 31.9 | 34.5 |
|           |                                                                    |      |      | 22.4                                                              | 15.5 | 16.3 |

<sup>a</sup>AE values were reproducible within ± 2 %.
